# Supplementary material
Source: PubMed Central journal article supplement (PMC4857761)
Supplement: NIHMS782758-supplement-Supplemental_Note_and_Tables.pdf [file NIHMS782758-supplement-Supplemental_Note_and_Tables.pdf]

## Supplementary Note

### Samples and mass spectrometry analysis

The Universal Proteomics Standard 1 (UPS1), which contains a mixture of 48 human proteins at equimolar concentrations was acquired from Sigma-Aldrich (St. Louis, MO). The MassPREP *E.coli* Digest Standard was from Waters (Milford, MA) and the MS Compatible Human Protein Extract, Digest was from Promega (Madison, WI). UPS1 standards were resuspended in 100 mM Tris pH 8, reduced with 5 mM TCEP for 30 min at 65°C, then alkylated with 50 mM iodoacetamide for 60 min in the dark. UPS1 standards were digested overnight with 1 µg trypsin (Promega, Madison, WI) in 100 mM Tris pH 8 at 37°C. UPS1, *E.coli* and human peptides were acidified with formic acid to 1% final concentration and loaded in various amounts, alone or in combination, onto an in-house made 75 µm x 12 cm analytical column emitter with 3 µm ReproSil-Pur C18-AQ (Dr.Maisch HPLC GmbH, Germany). A NanoLC-Ultra 1D plus (Eksigent, Dublin CA) nano-pump was used to deliver a 90 min gradient from 2% to 35% acetonitrile with 0.1% formic acid, followed by a 30 min wash with 80% acetonitrile and re-equilibration to 2% acetonitrile. Each sample condition was acquired twice on a TripleTOF 5600 mass spectrometer (AB SCIEX, Concord, Ontario, Canada), once using a Data Dependent Acquisition (DDA) method and once using the SWATH Data Independent Acquisition (DIA) method. The DDA run consisted of one 250 ms MS1 TOF survey scan from 400–1250 Da followed by ten 100 ms MS2 candidate ion scans (former precursors were excluded for 15 sec). The DIA run consisted of one 250 ms MS1 TOF survey scan followed by 33 sequential MS2 windows of 25 amu covering a mass range from 400–1250 Da at 100 ms per SWATH scan. The affinity purified (AP) samples and their mass spectrometry acquisition parameters were described previously<sup>1</sup>. Briefly, bait proteins EIF4A2, MEPCE and GFP (as negative control) with FLAG tags were affinity purified from cell lysate and digested on beads with trypsin. Each AP experiment was performed in biological triplicates and the resulting samples were analyzed by both DDA and DIA using the parameters described above, with the exception of a 50 ms MS1 scan in the DIA analysis and the use of a Nanoflex cHiPLC system at 200 nL/min (Eksigent ChromXP C18 3 µm × 75 µm × 15 cm column chip) for the chromatography. See **Supplementary Table 3** for the description of the samples.

### Peptide identification from DDA

Wiff files were converted to mzXML using the AB SCIEX MS Data Converter with the “ProteinPilot” option. DDA data were searched against their corresponding sequence databases using MSGFDB<sup>2</sup> with 50 ppm precursor mass tolerance while allowing for N-term acetylation (Nterm+42.012) and methionine oxidation (M+16.02) as variable modifications and carbamidomethylation on cysteine (C+57.021) as a fixed modification. The sequence database for UPS1 proteins was downloaded from the Sigma website (<http://www.sigmaaldrich.com/life-science/proteomics/mass-spectrometry/ups1-and-ups2-proteomic.html>) and UPS1-only samples were searched against this database concatenated with the *E. coli* database for accuracy of

FDR estimation with the Target/Decoy Approach<sup>3,4</sup>. The *E. coli* protein sequence database was downloaded from NCBI with Taxonomy ID: 511145, ver. 08/25/2009 and the human database was downloaded from NCBI RefSeq, ver. 10/29/2010. All searches results were filtered by enforcing a 1% peptide-level false discovery rate (FDR) using the Target/Decoy approach (TDA)<sup>3</sup>.

### **Spectral libraries for MSPLIT-DIA**

DDA search results were used to create three sample-specific spectral libraries: 1) an “*E. coli*” spectral library with peptides from UPS1 samples and *E. coli* lysate peptides; 2) a “*human*” spectral library with peptides from UPS1 samples and human lysate peptides; 3) an “*AP-specific*” spectral library with peptides from all AP-MS samples (See **Supplementary Table 3**). In all cases, the Peptide-Spectrum Matches (PSMs) from the corresponding DDA runs were pooled by retaining only the spectrum with the lowest MSGFDB probability for each unique peptide sequence and precursor charge state, and a peptide-level false discovery rate (FDR) of 1% was enforced using TDA<sup>3</sup>. We note that this is different from simply combining all peptides identified at 1% FDR from each run, which is undesirable as the errors in the combined peptide lists will grow proportionally to the number of runs included in the library. Our approach required us to use a stricter score threshold than that used for each individual run, which therefore resulted in some peptides identified in individual runs not being included in the pooled spectral library (see **Supplementary Figure 3b**). Each library spectrum was processed to reduce noise by removing all peaks that did not match to a theoretical fragment ion from the identified peptide within 0.05 Da mass tolerance; fragment ion types used to compute the theoretical ions were: b, y, b-H<sub>2</sub>O, b-NH<sub>3</sub>, y-H<sub>2</sub>O, y-NH<sub>3</sub>. For each ion type, charge states from +1 to the charge state of the precursor were considered. After constructing the target library, a decoy library of equal size was generated and appended to the library. Briefly, for each target spectrum in the library, an artificial decoy spectrum was generated using the shuffle-and-reposition method described previously<sup>5</sup>. Unless otherwise indicated, spectral libraries for MSPLIT-DIA matching were built from the union of all DDA runs of the same samples.

To further assess the applicability of MSPLIT-DIA using community-wide spectral libraries, a comprehensive and generic SWATH-Atlas library constructed by the Aebersold group from multiple human DDA runs on a TripleTOF 5600+ instrument (many of which from fractionated samples) was downloaded from <http://www.swathatlas.org/><sup>6</sup>.

### **Identification of multiplexed spectra by MSPLIT-DIA**

An overview of the proposed spectral library search method to identify multiplexed spectra in DIA data is illustrated in **Fig. 1**; a typical multiplex spectrum after MSPLIT-DIA identification is shown in **Supplementary Figure 1**. We define a multiplexed spectrum as an MS/MS spectrum derived from more than one peptide.

Identification of multiplexed spectra is performed by comparing each multiplexed spectrum to a library of reference single-peptide spectra and returning all spectra in the library that have significant similarity to the multiplexed spectrum. For each DIA spectrum, all library spectra with precursor mass in the DIA isolation window are considered valid candidates (e.g. the width of the isolation window used in this study is 25 Da). Note that, in contrast to targeted approaches for analyzing DIA data, MSPLIT-DIA does not require retention-time information for library peptides because MSPLIT-DIA can scan through the whole retention-time range for possible spectrum-spectrum matches (SSM).

Specifically, we represent an MS/MS spectrum as a set of peaks:  $S = \{p_1, p_2, \dots, p_n\}$  where each peak is a mass and intensity value pair. We define a spectral library  $L$  as a set of annotated spectra:  $\mathcal{L} = \{l_1, l_2, \dots, l_m\}$ , where each spectrum  $l_i$  is from one unique peptide and precursor charge state. To identify a multiplexed spectrum  $M$ , we first reduce noise in the spectrum using a window filtering method<sup>7</sup>: each peak is compared to peaks in a neighborhood of  $\pm 25$  Da and kept if it is within the 15 most intense peaks in its neighborhood. Then the similarity between  $M$  and each library spectrum  $l$  within the precursor mass tolerance of  $M$  is computed. However because  $M$  is potentially composed of multiple peptides, conventional similarity metrics such as the cosine similarity do not work well due to the presence of many unmatched peaks from other peptides in  $M$ . The concept of *projected-spectrum*<sup>8</sup> was therefore used to address this issue. Given  $M$  and a library spectrum  $l$ , the projected-spectrum  $M_l$  is determined as follows: for each peak  $p$  in the library spectrum  $l$ , we select peaks in  $M$  within a given mass error tolerance  $\delta$  of  $p$ , where  $\delta$  depends on instrument resolution ( $\delta$  was set to 50 ppm for the data analyzed here). If multiple peaks in  $M$  happen to match to  $p$ , only the peak with the highest intensity is retained in  $M_l$ . Other methods such as taking the matched peak with the smallest mass error to the library peak or merging all matched peaks by summing up their intensities were also tested but resulted in only minor differences in the performance of peptide identification. Intuitively, spectrum projection extracts a set of matching peaks in  $M$  that are most likely to belong to the same peptide as  $l$  while ignoring peaks that likely arise from other co-eluting peptides in  $M$ . After normalization of the spectra to Euclidian norm one, the similarity of  $l$  to the projected spectrum  $M_l$  can be evaluated using the conventional cosine similarity function<sup>9</sup>. A variant of the cosine similarity function, *projCosine*, can thus be defined to measure the similarity between a multiplexed spectrum  $M$  and a single-peptide spectrum  $l$ :

$$\text{projCosine}(M, l) = \text{cosine}(M_l, l)$$

The *projCosine* is computed between  $M$  and all library spectra within the selected precursor mass range, and all spectrum-spectrum matches (SSMs) with similarity greater than a significance threshold are considered matches to  $M$ . This threshold was determined using a target-decoy approach (see FDR estimation section below)<sup>3</sup>. A minimum of ten matched peaks between the library spectrum and the multiplexed spectrum was also required. As shown in **Supplementary Note Figure Sn1**, nearly all matching SSMs (spectral matches from the same peptides) have ten or more matching peaks.

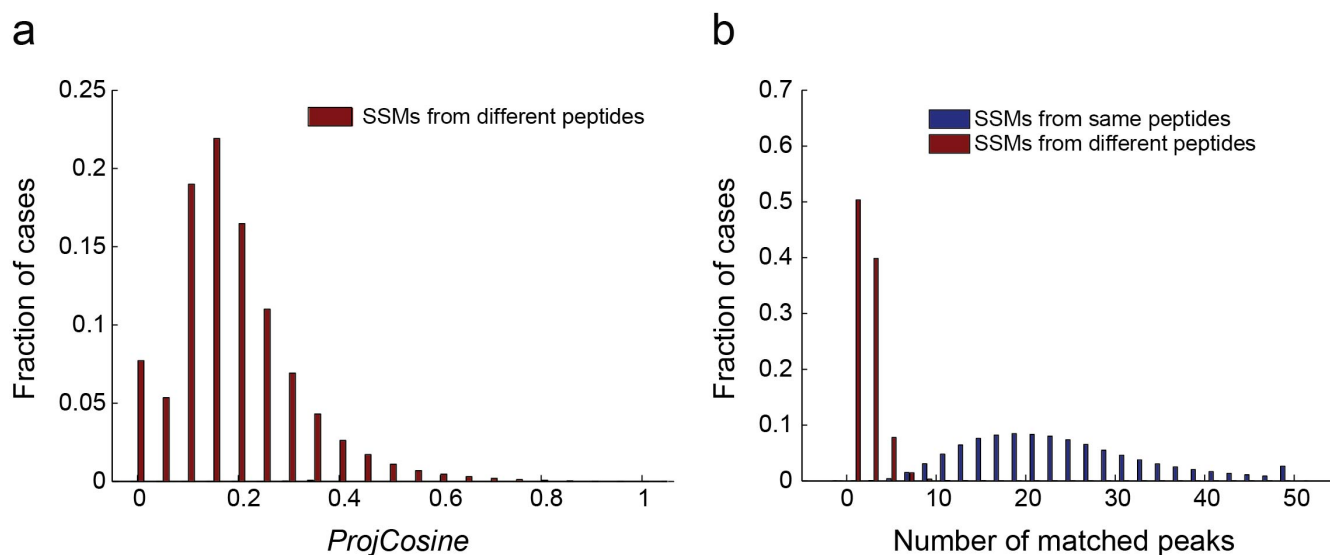

**Supplementary Note Figure SN1: Spectrum-Spectrum-Matches (SSM) statistics.** Using the set of all Peptide-Spectrum Matches (PSMs) identified at 1% peptide-level FDR in the DDA datasets (see Supplementary Table 3), we randomly selected 10,000 correct and 10,000 incorrect Spectrum-Spectrum Matches (SSMs). A matching SSM is a pair of PSMs identified to the same peptide sequence and charge state; a non-matching SSM is a pair of PSMs identified to different peptide sequences. (a) Projected cosines of the non-matching SSMs. The projected cosines similarity for non-matching SSMs (red) is rarely greater than 0.7, thus this was used as the minimum similarity threshold to detect dependent matches to a multiplexed spectrum. (b) Distribution of the number of matched peaks for matching or non-matching SSMs. The distribution of the number of matching peaks for matching (blue) and non-matching (red) SSMs shows that most matching SSMs have at least 10 matching peaks while non-matching SSMs have less than 10. Therefore, MSPLIT-DIA requires that a library spectrum have at least ten matching peaks to a multiplexed spectrum.

When identifying multiplexed spectra, it is critical to avoid using the same set of peaks in a multiplexed spectrum to support the identification of two (or more) different peptides, as this would lead to artificially high numbers of peptides matched to the same multiplexed spectrum. Examples of such cases include peptides that differ in their sequence only by a reversal of adjacent amino acids such as ID/DI in PEPTIDE and PEPTDIE respectively. In such cases, library spectra from these peptides may match to a multiplexed spectrum with similar good scores even if only one of these peptides is present in the sample. This issue is commonly ignored when analyzing DDA spectra because spectra are assumed to contain only one peptide and thus usually only the best-scoring peptide is considered to be a match. However, when dealing with multiplexed spectra, if there are entries in the spectral library that share many fragment ions, correct matches to these spectra can easily lead to dependent false positive multiplexed matches. In order to limit the dependency between multiple matches to the same multiplexed spectrum, the pairwise similarity between all library spectra that are matched to a multiplexed spectrum is computed. When two library spectra have high similarity (i.e.  $projCosine > 0.7$ ), only the spectrum with highest  $projCosine$  to  $M$  is returned. The similarity threshold was chosen based on the observation that non-matching SSMs (spectrum matches from different peptides) rarely have a  $projCosine$  similarity greater than 0.7 (see **Supplementary Note Figure SN1**). To further assess the performance of this threshold, we determined the fraction of MSPLIT-DIA SSMs at 1% FDR containing dependent peptides (i.e., spectra from peptides differing only by one acetylation or one oxidation) in the same multiplexed spectrum and found that it occurred in less than 0.1% of cases (well below our FDR threshold).

In DIA, each peptide is acquired and analyzed in multiple MS/MS spectra along its elution profile. Thus the ion chromatograms of peaks corresponding to fragment ions from the same peptide precursor correlate in retention time<sup>10, 11</sup>. To utilize this information, rather than analyzing each DIA spectrum as an independent spectrum, consecutive DIA spectra were analyzed together using a sliding-window approach. For a particular DIA spectrum  $M_t$  at retention time  $t$  we define its neighbor set  $N_{t,K} = \{M_{t-K}, \dots, M_t, \dots, M_{t+K}\}$  as  $M_t$  plus  $K$  spectra acquired right before  $M_t$  and  $K$  spectra acquired right after  $M_t$  with the same DIA precursor isolation window. Given a library spectrum  $l = \{p_1, p_2, \dots, p_n\}$ , the projected spectrum for each  $M_j$  in the neighbor set can be computed. Therefore each peak  $p_i$  in the library spectrum  $l$  has a set of up to  $2K+1$  matched peaks from the neighbor set. A vector of  $2K+1$  elements can then be generated by taking the intensity of matched peaks from each  $M_j, t - K \leq i \leq t + K$  (if no matching peak is found, an intensity of zero is used). This vector is then scaled to Euclidean norm one to define the retention time profile  $T(p_i, M_t, K)$  for a library peak  $p_i$  when matched to  $M_t$ . The *cosine* similarity between the time profiles of two peaks  $p_i$  and  $p_j$  can then be computed to assess whether the pair of peaks co-elute along the retention time window  $t-K$  to  $t+K$ :

$$timeCosine(M_t, p_i, p_j) = cosine(T(p_i, M_t, K), T(p_j, M_t, K))$$

The function *timeCosineSet* can then be computed for a set of peaks by taking the average *timeCosine* for all possible pairs of peaks in the set. Thus *timeCosineSet* can be used to assess whether the matched peaks between a library spectrum and a multiplexed spectrum co-elute and help separate correct matches from false positive matches (by random chance, a set of false matched peaks should not co-elute along chromatographic time). We also found that considering the *timeCosineSet* for only the top  $I$  most intense peaks in the library spectrum was more informative than using all peaks. This can be due to the fact that low-intensity peaks are more likely to be noise peaks and/or to have interference in multiplexed DIA spectra. Different values of  $I$  and  $K$  were tested and we found  $I=10$  and  $K=5$  to be robust across the samples of varying complexity analyzed here (see **Supplementary Note Figure SN1**). Finally, to combine information from spectral similarity and retention time correlation, we defined the combined score as the product of *projCosine* and *timeCosineSet* and used this score to rank the SSMs resulting from library search.

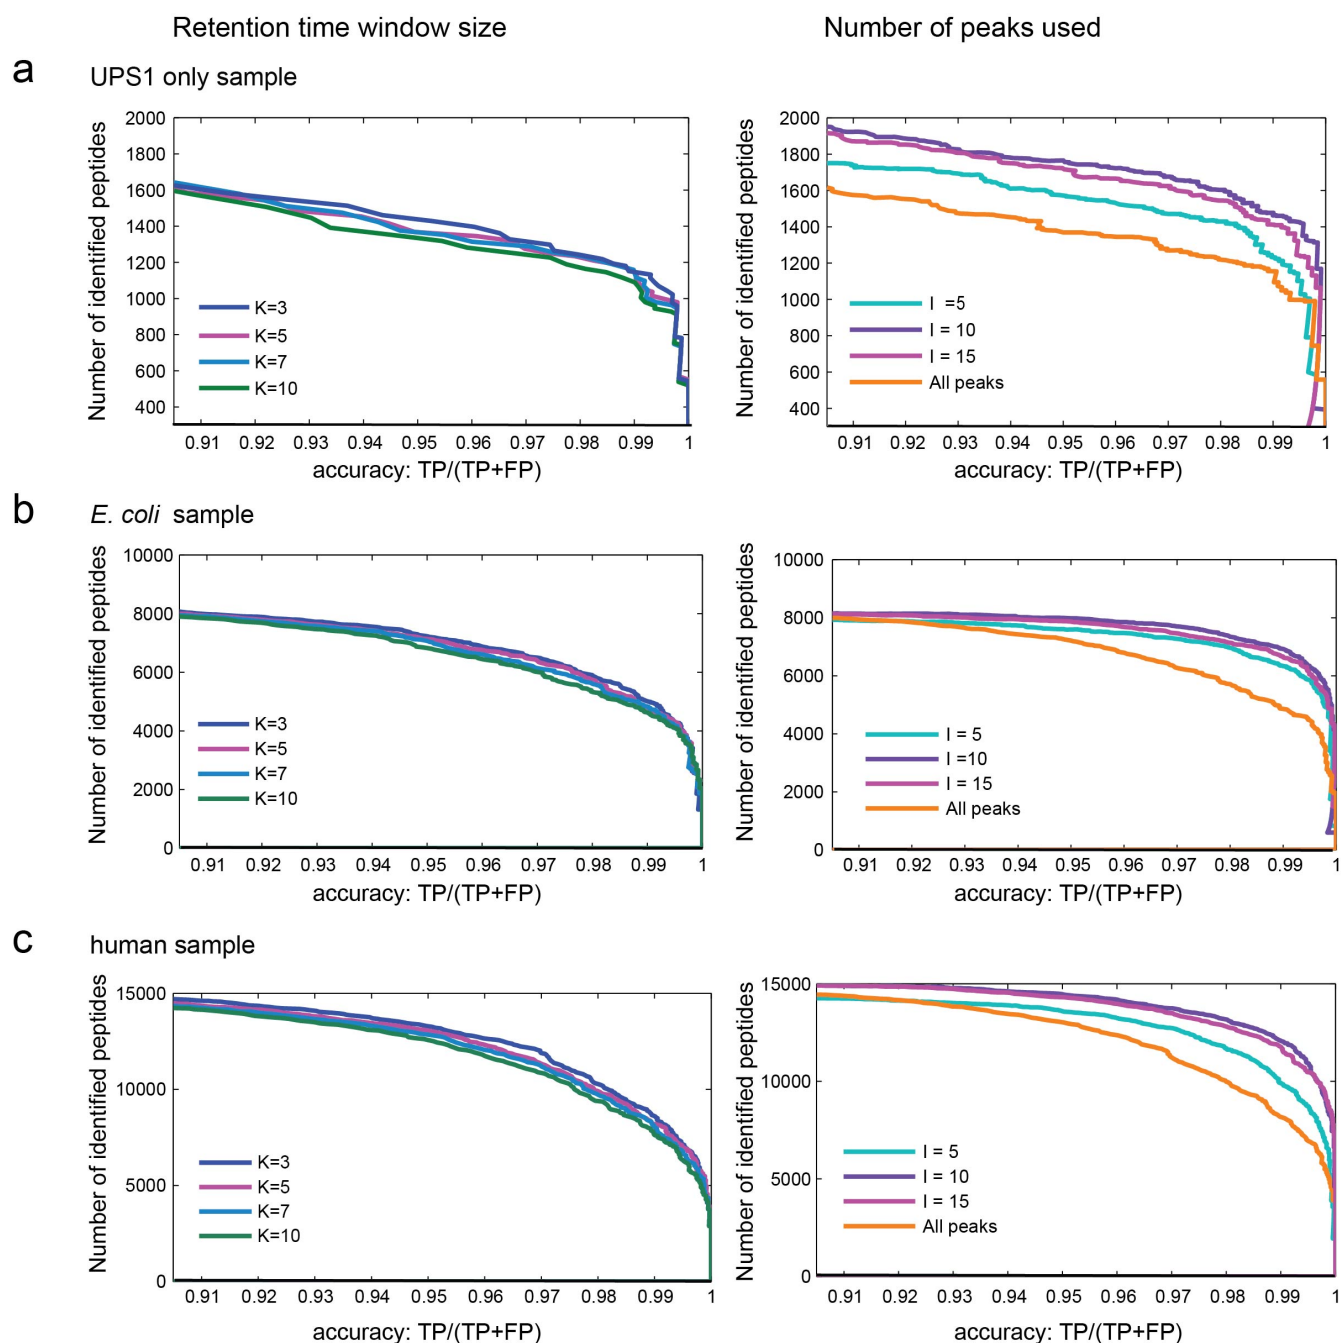

### Supplementary Note Figure SN1. Parameters for *timeCosineSet*.

MSPLIT-DIA evaluates the retention-time correlation of matched peaks between a library spectrum and a DIA spectrum (i.e. *timeCosineSet*) to assess whether these matched peaks co-elute in time and are thus likely to come from the same peptide precursor. Two parameters affecting the calculation of *timeCosineSet* were varied: K – the retention-time window in which the correlation is computed (left-side panels; all peaks were considered) and l – the number of most intense peaks with which the correlation is computed (right-side panels, K was fixed at 5). The number of peptides identified at different FDR was used to assess the effect of different parameters on performance. We found l=10 and K=5 to be the most suitable choices for all samples analyzed here.

### Estimation of FDR in MSPLIT-DIA

The threshold for reporting Spectrum-Spectrum-Matches (SSMs) was determined by enforcing False Discovery Rate (FDR) using the Target-Decoy Approach (TDA)<sup>3</sup>. Since by design each peptide is present in many MS/MS

spectra in DIA data, multiple true SSMs are likely to correspond to the same peptide while false SSMs (i.e., random matches) are more likely to correspond to different peptides. As such, an SSM-level FDR will likely yield a substantially higher FDR for peptide identifications<sup>4</sup>. We thus opted to enforce a more conservative peptide-level FDR by considering only the best-scoring SSM for each unique peptide and precursor charge for FDR enforcement via TDA. Once the score threshold is determined, all SSMs with scores above the threshold are accepted as matches for SSM-level analysis (note that this only adds more SSMs from the same peptide and does not change the peptide-level FDR).

The TDA for spectral library search was originally proposed<sup>5</sup> for analyzing DDA data where most MS/MS spectra originate from a single peptide. However most spectra in DIA data of moderately complex samples are multiplexed spectra (see **Fig. 1b**). To test whether the TDA approach can be extended to DIA data, we searched the *E. coli* lysate DIA data against a spectral library containing peptides from both *E. coli* and UPS1 proteins. Since UPS1 peptides are not expected to be present in the *E. coli* samples (all UPS1 proteins are from other species), identified peptides mapped to the UPS1 proteins are considered as false matches. In this spectral library, approximately 17.9% of peptides are from UPS1 proteins and thus it is expected that the same fraction of all false positive matches will be mapped to UPS1 proteins by random chance. Therefore the empirical number of false positive library matches in DIA data can be estimated by dividing the number of identified peptides mapped to UPS1 proteins by their relative proportion in the library. At a 1% FDR as enforced by TDA, we identified 12 peptides from UPS1 proteins out of a total of 6274 peptides from the 1  $\mu$ g *E. coli* lysate data, which corresponds to an empirical  $FDR = \frac{12/0.179}{6274} = 1.07\%$ , thus supporting the accuracy of the TDA estimation of FDR.

### **Using retention-time information for MSPLIT-DIA peptide identification**

Even though MSPLIT-DIA is designed to operate without prior knowledge of retention-time (RT) for library peptides, it can utilize RT information to improve sensitivity when it is available in the spectral library (See **Supplementary Figure 9**). MSPLIT-DIA can optionally conduct a two-pass search. The first-pass search is as described in the previous section in which MSPLIT-DIA scans the whole RT range for possible matches. Then, using the list of peptides identified at 1% FDR, MSPLIT-DIA builds a linear regression model between the library RT and the RT at which the peptides are detected in the DIA data using the least-squares approach, thus automatically correcting for possible systematic RT differences. MSPLIT-DIA then uses the identified peptides to automatically learn the distribution of RT differences between library and DIA peptides and thus determines a RT tolerance window that includes at least 95% of peptides identified in the first pass. In the second-pass search, only matches with library and DIA RT differences that fall within this tolerance window are considered. Since MSPLIT-DIA uses RT information when it is available in the library, results obtained with the SWATH-Atlas spectral library used RT information unless otherwise noted.

## Protein identification

Even though the main focus of the current work is on peptide identification, we also assessed the impact of the different methods on protein identification using a simple method for protein inference from the identified peptides<sup>12</sup>. First only unique peptides (i.e., mapping to only one protein entry) identified at 1% peptide-level FDR were considered for protein identification. Then, similar to computing the peptide-level FDR (where each peptide is assigned a score which is the highest score from all SSMs matching to that peptide), protein scores were assigned to the best score from all unique peptides mapped to each protein. We note that while this is a simple way to assign protein scores, it has actually been recently shown<sup>13</sup> to outperform popular approaches such as the more complex ProteinProphet calculation. Finally, protein-level FDR was determined using the standard TDA as for peptides and SSMs.

## Significance analysis of interaction data

The relative abundance of each protein in each of the triplicate purifications of the EIF4A2 or MEPCE baits in relation to the triplicate purifications of GFP alone (negative control sample) was calculated using spectral counting followed by SAINTexpress<sup>14</sup> analysis to detect proteins that display statistically significant enrichment over control. Only unique peptides (peptides not shared between multiple proteins) were considered, and the abundance of each protein was defined as the sum of spectral counts from all its unique peptides. SAINTexpress analysis was performed with default parameters from [www.crapome.org](http://www.crapome.org)<sup>15</sup>, and the results were filtered at 1% Bayesian FDR (**Supplementary Table 1**). The overlap between DDA and DIA data for these high-confidence proteins was analyzed, and the common proteins and proteins specifically detected in the MSPLIT-DIA analysis were further analyzed by DAVID<sup>16</sup> for Gene Ontology enrichment (Molecular Function GO category, with broadest terms filtered out; GO\_MF\_FAT). The resulting enrichment values are shown in **Supplementary Table 2**. All hits were manually inspected.

## Identification of peptides with PTMs by MSPLIT-DIA

MSPLIT-DIA can be used to search for peptides with post-translational modifications (PTMs) in DIA data, even if the modified spectrum is not initially present in the library. The PTMs to search for are specified by the user as inputs. Similar to spectral library search methods for DDA data<sup>17, 18</sup>, MSPLIT-DIA predicts the library spectra for modified peptides based on library spectra of the unmodified peptides. Specifically, for a library spectrum  $l = \{p_1, p_2, \dots, p_m\}$  of an unmodified peptide  $U$  of length  $n$ . Let  $U(\Delta, i)$  be a modified version of peptide  $U$  with a PTM of mass  $\Delta$  on the  $i^{\text{th}}$  amino acid. The library spectrum for  $U(\Delta, i)$  is predicted as follows: 1) associate each peak  $p \in l$  with a theoretical fragment ion  $t_j^c$  where  $t$  denotes the type of the fragment ion,  $c$  denotes the charge state and  $j$  denotes the amino acid position of the fragment ion (e.g., a doubly-charged  $b_3$



ions will be represented as  $b_3^2$ ). If multiple fragment ions can be matched to a peak, the one with the closest mass is used; 2) a peak is defined as modified if it corresponds to a fragment ion such that:  $\{t_j^c | j \geq i\}$  if  $t$  is a prefix (n-terminal) ion or  $\{t_j^c | j > n - i\}$  if  $t$  is a suffix (c-terminal) ion. The library spectrum of the modified peptide is constructed by shifting all the modified peaks by  $\Delta/c$  along the  $m/z$  axis while retaining the peak intensities from the unmodified peptide spectrum. Results for the identification of oxidized peptides are shown in **Supplementary Note Figure SN3**.

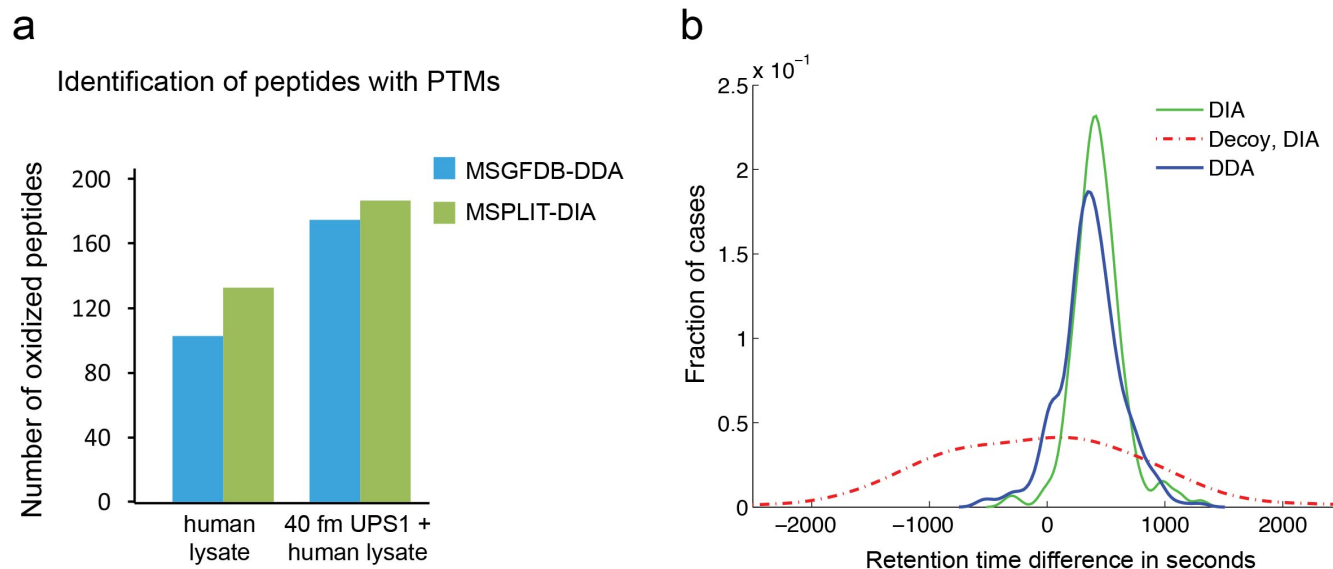

### Supplementary Note Figure SN3. Identification of peptides with PTMs.

One of the goals of discovery tools in proteomics is to detect peptides with variable modifications. For targeted approaches, these modified peptides need to be included a priori in the spectral library. A key feature of MSPLIT-DIA is that peptide detection can be performed without using any retention time constraints in DIA searches and without requiring normalized retention times in the spectral library (thus making it much easier to build these libraries from public datasets). In particular, this allows MSPLIT-DIA searches for peptides that are not in the spectral library but can be extrapolated from peptides in the library. For example, even though MSPLIT-DIA was not designed for thorough identification of post-translationally modified peptides, we were able to use library spectra of unmodified peptides to predict and identify spectra of the oxidized version of the same peptides. To demonstrate this, we allowed for methionine oxidation as a variable modification while searching the human lysate data against the human lysate library consisting of only unmodified peptides. The library spectra for modified peptides were predicted by shifting corresponding peaks to the appropriate  $m/z$  location. (a) Number of human lysate and UPS1 peptides with oxidized methionine detected by MSGFDB-DDA and MSPLIT-DIA; MSPLIT-DIA was able to identify 7-28% more peptides with methionine oxidation than MSGFDB-DDA. (b) Retention time difference between the modified and unmodified species detected. Since it was previously shown that peptides with a particular PTM display a systematic shift in retention time (RT) compared to the corresponding unmodified peptides<sup>19</sup>, we plotted the distribution of the RT difference between identified peptides with or without methionine oxidation in DIA and DDA runs and verified that these display very similar distributions (blue and green lines). By contrast, the modified and unmodified peptides pairs from decoy matches (red dashed line) display a much wider distribution than that of pairs from target matches.

### Reproducibility of peptide identifications in DIA and DDA

To compute reproducibility in peptide identification, multiple injections of *E. coli* and human lysate samples were analyzed both by DDA and DIA. We defined a set of identified peptides in the sample as peptides that are identified in at least one DDA run and at least one DIA run at 1% FDR. A peptide is reproducibly identified in  $K$  runs if it passes the 1% FDR in all  $K$  runs. Reproducibility was computed separately for DDA and DIA runs. To investigate the relationship between peptide abundance and reproducibility, we defined peptide abundance as the average spectral counts of a peptide over the multiple DIA runs under consideration. Peptides were then

binned according to their abundance and the reproducibility of peptide identification across different abundance bins was assessed (see **Supplementary Figure 4**). We also investigated the major factors affecting the reproducibility of peptide identification. A peptide may not be reproducibly identified across multiple runs because: 1) it was not selected for MS/MS analysis (in DDA) or was not detectable above background noise (in the case of DIA) or 2) it was not identified by the computational method at the selected FDR. We investigated possibility #2 by varying the FDR threshold and monitoring reproducibility, which indicated that possibility #2 was the source of most of the apparent non-reproducibility in DIA but not DDA data (**Supplementary Figure 4**).

### Effect of spectral quality in peptide identification

In order to investigate the factors that affect peptide identification in DIA data, the list of identified peptides from the parallel DDA run was used as a reference to assess their detectability in each SWATH run. The reference peptide list was separated into two groups: those that were identified by MSPLIT-DIA at 1% FDR in DIA and those that were not. For each peptide that was not identified by MSPLIT-DIA at 1% FDR, retention time information from the DDA run was used to help locate the peptides in DIA by only considering DIA spectra within 5 min of the recorded DDA retention time for the corresponding peptide. The best-scoring DIA spectrum was then considered an unidentified match for that peptide. Two statistics were calculated for the set of identified and unidentified peptides in DIA: i) the number of signal peaks in the library spectrum and ii) the number of matched peaks between a library spectrum and a DIA spectrum that are also signal peaks in the DIA spectrum. A signal peak is defined as a peak with signal-to-noise ratio of at least two. Intensity level for noise peaks was estimated as the median intensity of the 50% lowest-intensity peaks in a spectrum. Signal-to-noise ratio was then computed by dividing the intensity of each peak by the intensity level for noise peaks (see **Supplementary Note Figure SN4**).

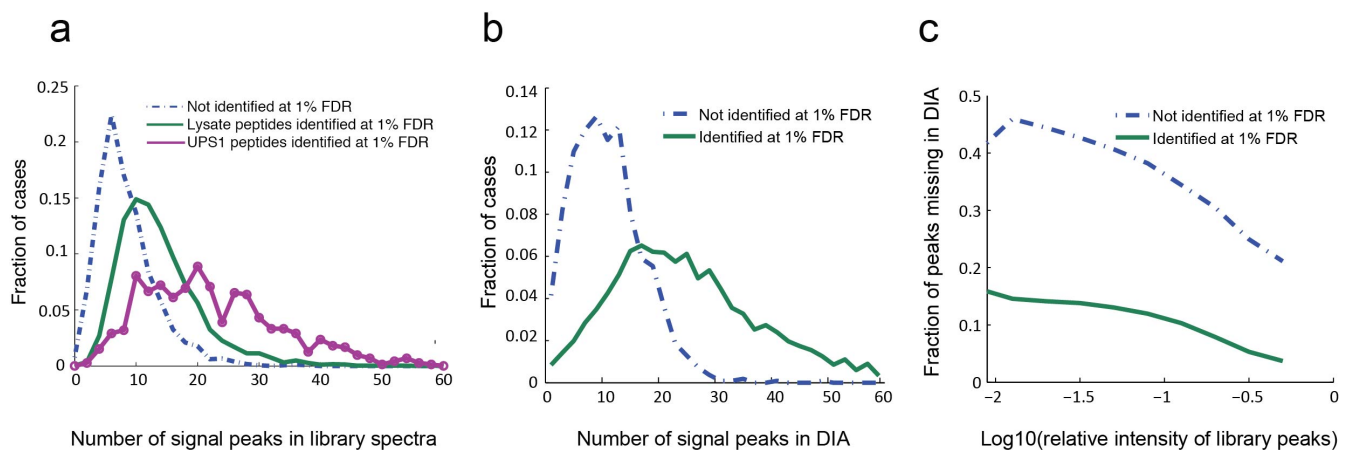

#### Supplementary Note Figure SN4. Spectrum quality in library and DIA spectra.

The 40 fm UPS1 + *E. coli* (see **Supplementary Table 3**) was used as a representative run to illustrate the investigation of peptide detectability in DIA data (analysis from other runs shows similar trends). Peptides identified in the parallel DDA run were used as a reference set and divided into two groups: those that were identified by MSPLIT-DIA at 1% FDR and those that were not. Each peptide was investigated with respect to its best-matching DIA spectrum in the data. Peptides not identified by MSPLIT-DIA were assigned to their DIA spectra with retention-time information from the parallel DDA run to

reduce the chance of false matches. Factors that distinguish the two groups of peptides were investigated as they represent properties that affect peptide identification in DIA data. Panel (a) shows the distribution of the number of signal peaks in library spectra, where signal peaks are MS/MS peaks with signal-to-noise ratio greater than two. We note that the number of signal peaks serves as a measure of the quality of library spectra. Library spectra often contain more fragment ion peaks than the number of signal peaks but these peaks are present at low intensity (i.e., often close to or at the level of noise). In general, peptides identified by MSPLIT-DIA (green, magenta) have better library spectra than those that were not identified by MSPLIT-DIA (blue). Furthermore, identified peptides were further separated into lysate peptides (green) and UPS1 peptides (magenta): UPS1 peptides tend to have better library spectra than lysate peptides identified by MSPLIT-DIA, which could explain why MSPLIT-DIA had better sensitivity at identifying UPS1 peptides than lysate peptides. (b) Number of signal peaks in DIA spectra for identified (green) and unidentified (blue) peptides. (c) Peaks in library spectra but missing in the corresponding DIA spectra were binned by their intensity relative to the most-intense peak in the library spectrum. As expected, unidentified DIA spectra had a substantially higher fraction of missing peaks (irrespective of relative peak intensity) than observed in identified DIA spectra.

## Peptide identification with DIA-Umpire

Pseudo-MS/MS spectra generated by DIA-Umpire<sup>20</sup> were searched by X!Tandem<sup>21</sup> and MSGF+<sup>22</sup>, allowing tryptic peptides with up to one missed cleavage, oxidation of methionine and N-terminal acetylation as variable modifications, and cysteine alkylation as a fixed modification. The precursor-ion mass tolerance was set to 50 ppm and the fragment-ion mass tolerance to 40 ppm. Search results were converted into pepXML format and analyzed with PeptideProphet<sup>23</sup> via the TPP<sup>24</sup> for each of the three quality categories of MS/MS spectra. iProphet<sup>25</sup> was used to merge search results from X! Tandem and MSGF+. Unique peptide identifications for each DIA run were filtered at 1% FDR, estimated via the target-decoy approach. The number of proteins with at least one unique peptide was determined directly from the PeptideProphet results.

## Peptide extraction with PeakView, OpenSWATH and Skyline

Targeted peptide extraction was performed using PeakView<sup>1, 11</sup>, OpenSWATH<sup>26</sup> or Skyline<sup>27</sup>. To enable comparable analysis of peptide detection in DIA data, all assay libraries were derived from the same peptide spectral libraries that were used for MSPLIT-DIA searches (see above). All unmodified peptides were considered valid candidates for extraction. The five most intense peaks annotated as b or y-ions for each peptide were selected to generate the assay libraries. All assay libraries were generated in a tab-delimited text format appropriate for each tool. We note that for PeakView, the full spectral libraries were imported because PeakView automatically selects the top five fragment ions for extraction.

PeakView extraction was done as described before<sup>1</sup> (using PeakView v.2.1.0.1104 with SWATH microapp version 2.0.0.2003) with 50 ppm mass tolerance within  $\pm 5$  min of the assigned retention time (RT). PeakView results were filtered at 1% FDR<sup>11</sup>. For OpenSWATH, the daily build version of 10/8/2014 was used. Assay libraries were first converted to TraML format using the utility program ConvertTSVToTraML. Decoy assay libraries were generated using the OpenSwathDecoyGenerator program with default parameters. Targeted extraction was done using the OpenSwathWorkflow program with a RT window of  $\pm 5$  min and 0.05 Da fragment mass tolerance. Final scores for the extracted peak groups were calculated using pyprophet (v0.11.1) and results were filtered using a 1% FDR. For the UPS and lysate samples analysis with sample-specific

libraries, OpenSWATH was not able to finish processing the data so we were not able to include its results for these samples. The performance of OpenSWATH was benchmarked against other tools using data from the AP-MS samples (see **Supplementary Figure 9**). For Skyline analysis (64bit, v2.6.0.6709), decoy assay libraries were generated using the "Add Decoy Peptides" function and targeted extraction was performed using 0.05 Da fragment mass tolerance and  $\pm 5$  min retention time window. The "Train Model" function was used to re-train a new scoring model for each sample and all peak groups were re-scored and re-integrated using the new scoring model. Results were filtered and exported at 1% FDR.

To ensure the same FDR estimation was used for all methods, we determined peptide-level FDR using the Target/Decoy approach (TDA). For each unique peptide sequence, we chose the highest scoring match or peak group. At a particular score threshold T, FDR was computed as the number of decoy library matches divided by the number of target library matches above the score threshold T.

When the assay libraries or spectral libraries are not built from the parallel DDA runs of the same samples as the DIA runs, there is the possibility of retention-time drift between the libraries and the DIA data (e.g., SWATH-Atlas library vs AP-MS samples). In these cases, we performed RT-calibration before doing targeted extraction. However, in order to perform RT-calibration, one usually needs to know *a priori* a set of common peptides that are present in the samples (e.g. iRT peptides<sup>28</sup>). Since in our case no iRT peptides were added into the sample, we manually selected a set of peptides (twelve for lysate samples and ten for the AP-MS samples) identified by MSPLIT-DIA and used them as calibration peptides. We selected the peptides such that 1) they were identified by MSPLIT-DIA at 1% FDR across all samples of the same type (i.e. on all human samples or on all *E. coli* samples; we generated a set of peptides for each type of samples); 2) they span the entire chromatographic range; 3) they roughly spread out evenly across the chromatographic range and have high *proj-cosine* similarity (i.e.  $> 0.85$ ). For PeakView, the "Calculate RT Fit" function was used to calculate RT-calibration. For OpenSWATH the selected peptides were input as "iRT" peptides to the using the "-tr\_irt options". For Skyline, the selected peptides were input as "Standard peptides" in the iRT calculator and "Retention time predictor" functionality. As shown in **Supplementary Figure 9** by the results labeled with "(MSPLIT-DIA-assisted RT alignment)", retention time calibration using peptides identified by MSPLIT-DIA significantly improved targeted peptide extraction for all tools without the need to spike in additional calibration peptides.

### **Importing MSPLIT-DIA results for targeted quantification**

Since MSPLIT-DIA is designed as a discovery tool to perform peptide identification in DIA data, it is robust to retention time changes between the spectral library and DIA data. As such, peptides identified by MSPLIT-DIA can be used to generate sample-specific assay libraries to perform targeted quantification using tools like PeakView, Skyline or OpenSWATH. Sample-specific libraries reduce the size of the assay libraries input into targeted quantification tools and also provide the actual retention time where the peptides were detected in the

DIA data (thus addressing any potential issues regarding retention-time drift between the peptide in the library and DIA data). MSPLIT-DIA currently exports its results to PeakView, Skyline and OpenSWATH in their text-based format (*i.e.*, ‘.txt’ and ‘.csv’, respectively). For each peptide that was identified at 1% peptide-level FDR, MSPLIT-DIA exports: 1) the retention time at which the best scoring peptide is identified in the DIA run and 2) the fragment mass and intensity information from that peptide from the corresponding DDA library spectrum (default) or from the DIA spectrum where the peptide was identified.

## Data and software availability

Mass spectrometry data used were deposited in the MassIVE repository at <http://massive.ucsd.edu/ProteoSAFe/status.jsp?task=a4b32b9ba82e4885a8956b97ca71a1f8>, which can be accessed via FTP with username: MSV000078545 and password: 123456. The MSPLIT-DIA software is available for both download and online access at <http://proteomics.ucsd.edu/software-tools/msplit-dia/>.

## References:

1. Lambert, J.P. et al. Mapping differential interactomes by affinity purification coupled with data-independent mass spectrometry acquisition. *Nat Methods* **10**, 1239-1245 (2013).
2. Kim, S. et al. The generating function of CID, ETD, and CID/ETD pairs of tandem mass spectra: applications to database search. *Mol Cell Proteomics* **9**, 2840-2852 (2010).
3. Elias, J.E. & Gygi, S.P. Target-decoy search strategy for increased confidence in large-scale protein identifications by mass spectrometry. *Nat Methods* **4**, 207-214 (2007).
4. Jeong, K., Kim, S. & Bandeira, N. False discovery rates in spectral identification. *BMC Bioinformatics* **13 Suppl 16**, S2 (2012).
5. Lam, H., Deutsch, E.W. & Aebersold, R. Artificial decoy spectral libraries for false discovery rate estimation in spectral library searching in proteomics. *J Proteome Res* **9**, 605-610 (2010).
6. Rosenberger, G. et al. A repository of assays to quantify 10,000 human proteins by SWATH-MS. *Sci Data* **1**, 140031 (2014).
7. Tanner, S. et al. InsPecT: identification of posttranslationally modified peptides from tandem mass spectra. *Anal Chem* **77**, 4626-4639 (2005).
8. Wang, J., Perez-Santiago, J., Katz, J.E., Mallick, P. & Bandeira, N. Peptide identification from mixture tandem mass spectra. *Mol Cell Proteomics* **9**, 1476-1485 (2010).
9. Lam, H. et al. Development and validation of a spectral library searching method for peptide identification from MS/MS. *Proteomics* **7**, 655-667 (2007).
10. Geromanos, S.J. et al. The detection, correlation, and comparison of peptide precursor and product ions from data independent LC-MS with data dependant LC-MS/MS. *Proteomics* **9**, 1683-1695 (2009).
11. Gillet, L.C. et al. Targeted data extraction of the MS/MS spectra generated by data-independent acquisition: a new concept for consistent and accurate proteome analysis. *Mol Cell Proteomics* **11**, O111016717 (2012).
12. Gupta, N. & Pevzner, P.A. False discovery rates of protein identifications: a strike against the two-peptide rule. *J Proteome Res* **8**, 4173-4181 (2009).
13. Shanmugam, A.K., Yocum, A.K. & Nesvizhskii, A.I. Utility of RNA-seq and GPMDB protein observation frequency for improving the sensitivity of protein identification by tandem MS. *J Proteome Res* **13**, 4113-4119 (2014).
14. Teo, G. et al. SAINTexpress: improvements and additional features in Significance Analysis of INTeractome software. *J Proteomics* **100**, 37-43 (2014).
15. Mellacheruvu, D. et al. The CRAPome: a contaminant repository for affinity purification-mass

- spectrometry data. *Nat Methods* **10**, 730-736 (2013).
16. Huang, D.W. et al. DAVID Bioinformatics Resources: expanded annotation database and novel algorithms to better extract biology from large gene lists. *Nucleic Acids Res* **35**, W169-175 (2007).
  17. Ahrne, E., Nikitin, F., Lisacek, F. & Muller, M. QuickMod: A tool for open modification spectrum library searches. *J Proteome Res* **10**, 2913-2921 (2011).
  18. Ye, D. et al. Open MS/MS spectral library search to identify unanticipated post-translational modifications and increase spectral identification rate. *Bioinformatics* **26**, i399-406 (2010).
  19. Fu, Y. et al. DeltAMT: a statistical algorithm for fast detection of protein modifications from LC-MS/MS data. *Mol Cell Proteomics* **10**, M110 000455 (2011).
  20. Tsou, C.C. et al. DIA-Umpire: comprehensive computational framework for data-independent acquisition proteomics. *Nat Methods* **12**, 258-264, 257 p following 264 (2015).
  21. Craig, R. & Beavis, R.C. TANDEM: matching proteins with tandem mass spectra. *Bioinformatics* **20**, 1466-1467 (2004).
  22. Kim, S. & Pevzner, P.A. MS-GF+ makes progress towards a universal database search tool for proteomics. *Nat Commun* **5**, 5277 (2014).
  23. Keller, A., Nesvizhskii, A.I., Kolker, E. & Aebersold, R. Empirical statistical model to estimate the accuracy of peptide identifications made by MS/MS and database search. *Anal Chem* **74**, 5383-5392 (2002).
  24. Deutsch, E.W. et al. A guided tour of the Trans-Proteomic Pipeline. *Proteomics* **10**, 1150-1159 (2010).
  25. Shteynberg, D. et al. iProphet: multi-level integrative analysis of shotgun proteomic data improves peptide and protein identification rates and error estimates. *Mol Cell Proteomics* **10**, M111 007690 (2011).
  26. Rost, H.L. et al. OpenSWATH enables automated, targeted analysis of data-independent acquisition MS data. *Nat Biotechnol* **32**, 219-223 (2014).
  27. MacLean, B. et al. Skyline: an open source document editor for creating and analyzing targeted proteomics experiments. *Bioinformatics* **26**, 966-968 (2010).
  28. Escher, C. et al. Using iRT, a normalized retention time for more targeted measurement of peptides. *Proteomics* **12**, 1111-1121 (2012).

**Supplementary Table 1. High confidence protein identifications.** Affinity purification coupled to mass spectrometry was performed on biological triplicates of the FLAG-EIF4A2 bait, the FLAG-MEPCE bait and FLAG-GFP as a negative control. Mass spectrometry was acquired using a standard Data Dependent Acquisition (DDA) protocol followed by MSGFDB analysis (blue shading) or by Data Independent Acquisition (SWATH) using MSPLIT-DIA (green shading). SAINTexpress (Teo et al., *J Proteomics*, 2014) was used to score the data based on the spectral counts distribution in the purifications of the bait compared to the negative controls. The averaged SAINT score (AvgP) across all replicates was used for Bayesian FDR (BFDR) modelling; 1% FDR was set as a reporting cutoff for high confidence hits. For each bait-prey interaction, once an interaction passes the confidence threshold in at least one of the acquisition methods, all data pertaining to this bait-prey interaction across DDA and DIA are returned for comparative purposes. The Prey Protein accessions are from Uniprot; the Prey Gene is from HUGO (at NCBI). The number of spectra matched to the prey in each of the biological replicates is indicated in the "Spectra" column ("|" is a delimiter) and the averaged spectral count is shown in the AvgSpec column. The spectra across the 3 GFP negative controls are shown (Control Spectra) alongside the Averaged SAINT score (AvgP), the maximal SAINT score across the 3 replicates (maxP) and the BFDR. The acquisition type (DDA or DIA) is listed and the interactions reaching the confidence threshold are labeled (pink) in the "high confidence" column.

| Bait   | Prey Protein | Prey Gene | Spectra     | AvgSpec | Control Spectra | AvgP | MaxP | BFDR | Acquisition | High Confidence |
|--------|--------------|-----------|-------------|---------|-----------------|------|------|------|-------------|-----------------|
| EIF4A2 | ABCE1_HUMAN  | ABCE1     | 17 15 16    | 16      | 1 4 4           | 1    | 1    | 0    | DDA         | 1               |
| EIF4A2 | ABCE1_HUMAN  | ABCE1     | 61 55 81    | 65.67   | 1 2 5           | 1    | 1    | 0    | DIA         | 1               |
| EIF4A2 | ATX2_HUMAN   | ATXN2     | 9 8 5       | 7.33    | 0 0 0           | 1    | 1    | 0    | DDA         | 1               |
| EIF4A2 | ATX2_HUMAN   | ATXN2     | 17 19 24    | 20      | 0 0 0           | 1    | 1    | 0    | DIA         | 1               |
| EIF4A2 | ATX2L_HUMAN  | ATXN2L    | 32 37 36    | 35      | 0 0 1           | 1    | 1    | 0    | DDA         | 1               |
| EIF4A2 | ATX2L_HUMAN  | ATXN2L    | 88 92 114   | 98      | 1 0 0           | 1    | 1    | 0    | DIA         | 1               |
| EIF4A2 | BA2L2_HUMAN  | PRRC2C    | 38 31 43    | 37.33   | 1 0 1           | 1    | 1    | 0    | DDA         | 1               |
| EIF4A2 | BA2L2_HUMAN  | PRRC2C    | 83 89 94    | 88.67   | 0 0 0           | 1    | 1    | 0    | DIA         | 1               |
| EIF4A2 | BAT2_HUMAN   | PRRC2A    | 52 48 47    | 49      | 0 0 0           | 1    | 1    | 0    | DDA         | 1               |
| EIF4A2 | BAT2_HUMAN   | PRRC2A    | 165 154 150 | 156.33  | 0 0 0           | 1    | 1    | 0    | DIA         | 1               |
| EIF4A2 | EDRF1_HUMAN  | EDRF1     | 6 10 5      | 7       | 0 0 0           | 1    | 1    | 0    | DDA         | 1               |
| EIF4A2 | EDRF1_HUMAN  | EDRF1     | 23 21 19    | 21      | 0 0 0           | 1    | 1    | 0    | DIA         | 1               |
| EIF4A2 | CN166_HUMAN  | C14orf166 | 11 15 14    | 13.33   | 6 5 5           | 0.32 | 0.63 | 0.68 | DDA         |                 |
| EIF4A2 | CN166_HUMAN  | C14orf166 | 60 56 66    | 60.67   | 12 11 12        | 1    | 1    | 0    | DIA         | 1               |
| EIF4A2 | CSK21_HUMAN  | CSNK2A1   | 14 17 15    | 15.33   | 1 1 1           | 1    | 1    | 0    | DDA         | 1               |
| EIF4A2 | CSK21_HUMAN  | CSNK2A1   | 33 35 34    | 34      | 0 0 0           | 1    | 1    | 0    | DIA         | 1               |
| EIF4A2 | CSK22_HUMAN  | CSNK2A2   | 15 16 13    | 14.67   | 1 0 1           | 1    | 1    | 0    | DDA         | 1               |
| EIF4A2 | CSK22_HUMAN  | CSNK2A2   | 26 28 24    | 26      | 2 3 2           | 1    | 1    | 0    | DIA         | 1               |
| EIF4A2 | CSK2B_HUMAN  | CSNK2B    | 4 2 4       | 3.33    | 0 0 0           | 0.98 | 1    | 0.02 | DDA         |                 |
| EIF4A2 | CSK2B_HUMAN  | CSNK2B    | 5 7 5       | 5.67    | 0 0 0           | 1    | 1    | 0    | DIA         | 1               |
| EIF4A2 | CUL1_HUMAN   | CUL1      | 6 5 4       | 5       | 0 0 0           | 1    | 1    | 0    | DIA         | 1               |
| EIF4A2 | DAZP1_HUMAN  | DAZAP1    | 3 3 4       | 3.33    | 0 0 0           | 0.99 | 1    | 0.01 | DDA         | 1               |
| EIF4A2 | DAZP1_HUMAN  | DAZAP1    | 6 13 11     | 10      | 0 0 0           | 1    | 1    | 0    | DIA         | 1               |
| EIF4A2 | DDX1_HUMAN   | DDX1      | 21 25 27    | 24.33   | 8 8 10          | 0.66 | 0.99 | 0.34 | DDA         |                 |
| EIF4A2 | DDX1_HUMAN   | DDX1      | 95 87 94    | 92      | 11 25 20        | 1    | 1    | 0    | DIA         | 1               |
| EIF4A2 | DDX17_HUMAN  | DDX17     | 12 11 17    | 13.33   | 3 4 4           | 0.86 | 1    | 0.14 | DDA         |                 |
| EIF4A2 | DDX17_HUMAN  | DDX17     | 32 47 42    | 40.33   | 12 12 7         | 1    | 1    | 0    | DIA         | 1               |
| EIF4A2 | DDX21_HUMAN  | DDX21     | 14 12 13    | 13      | 2 3 3           | 1    | 1    | 0    | DDA         | 1               |
| EIF4A2 | DDX21_HUMAN  | DDX21     | 31 26 49    | 35.33   | 2 0 2           | 1    | 1    | 0    | DIA         | 1               |
| EIF4A2 | DDX3X_HUMAN  | DDX3X     | 35 39 40    | 38      | 6 9 8           | 1    | 1    | 0    | DDA         | 1               |
| EIF4A2 | DDX3X_HUMAN  | DDX3X     | 138 119 145 | 134     | 24 27 24        | 1    | 1    | 0    | DIA         | 1               |
| EIF4A2 | DDX3Y_HUMAN  | DDX3Y     | 3 4 3       | 3.33    | 0 0 0           | 0.99 | 1    | 0.01 | DDA         | 1               |
| EIF4A2 | DDX5_HUMAN   | DDX5      | 19 18 20    | 19      | 7 6 7           | 0.74 | 0.92 | 0.26 | DDA         |                 |
| EIF4A2 | DDX5_HUMAN   | DDX5      | 59 50 74    | 61      | 11 11 7         | 1    | 1    | 0    | DIA         | 1               |
| EIF4A2 | DDX50_HUMAN  | DDX50     | 7 6 8       | 7       | 0 0 0           | 1    | 1    | 0    | DDA         | 1               |
| EIF4A2 | DDX50_HUMAN  | DDX50     | 4 5 10      | 6.33    | 5 0 0           | 0.51 | 0.84 | 0.49 | DIA         |                 |
| EIF4A2 | DHX29_HUMAN  | DHX29     | 4 8 9       | 7       | 0 0 0           | 1    | 1    | 0    | DDA         | 1               |
| EIF4A2 | DHX29_HUMAN  | DHX29     | 7 4 20      | 10.33   | 0 0 0           | 1    | 1    | 0    | DIA         | 1               |
| EIF4A2 | EIF3A_HUMAN  | EIF3A     | 232 237 233 | 234     | 15 12 12        | 1    | 1    | 0    | DDA         | 1               |
| EIF4A2 | EIF3A_HUMAN  | EIF3A     | 970 960 928 | 952.67  | 43 35 37        | 1    | 1    | 0    | DIA         | 1               |
| EIF4A2 | EIF3B_HUMAN  | EIF3B     | 103 126 110 | 113     | 6 4 3           | 1    | 1    | 0    | DDA         | 1               |
| EIF4A2 | EIF3B_HUMAN  | EIF3B     | 490 459 460 | 469.67  | 15 12 16        | 1    | 1    | 0    | DIA         | 1               |
| EIF4A2 | EIF3C_HUMAN  | EIF3C     | 104 105 116 | 108.33  | 10 9 7          | 1    | 1    | 0    | DDA         | 1               |
| EIF4A2 | EIF3C_HUMAN  | EIF3C     | 463 429 403 | 431.67  | 26 26 22        | 1    | 1    | 0    | DIA         | 1               |
| EIF4A2 | EIF3D_HUMAN  | EIF3D     | 57 70 50    | 59      | 0 1 0           | 1    | 1    | 0    | DDA         | 1               |
| EIF4A2 | EIF3D_HUMAN  | EIF3D     | 228 189 194 | 203.67  | 4 3 2           | 1    | 1    | 0    | DIA         | 1               |
| EIF4A2 | EIF3E_HUMAN  | EIF3E     | 69 59 67    | 65      | 5 3 3           | 1    | 1    | 0    | DDA         | 1               |
| EIF4A2 | EIF3E_HUMAN  | EIF3E     | 349 373 396 | 372.67  | 16 20 14        | 1    | 1    | 0    | DIA         | 1               |
| EIF4A2 | EIF3F_HUMAN  | EIF3F     | 86 83 77    | 82      | 6 6 11          | 1    | 1    | 0    | DDA         | 1               |
| EIF4A2 | EIF3F_HUMAN  | EIF3F     | 364 366 349 | 359.67  | 27 25 16        | 1    | 1    | 0    | DIA         | 1               |
| EIF4A2 | EIF3G_HUMAN  | EIF3G     | 125 124 123 | 124     | 25 28 28        | 1    | 1    | 0    | DDA         | 1               |
| EIF4A2 | EIF3G_HUMAN  | EIF3G     | 493 474 496 | 487.67  | 85 82 102       | 1    | 1    | 0    | DIA         | 1               |
| EIF4A2 | EIF3H_HUMAN  | EIF3H     | 85 90 75    | 83.33   | 6 5 8           | 1    | 1    | 0    | DDA         | 1               |
| EIF4A2 | EIF3H_HUMAN  | EIF3H     | 342 328 309 | 326.33  | 11 10 9         | 1    | 1    | 0    | DIA         | 1               |
| EIF4A2 | EIF3I_HUMAN  | EIF3I     | 70 69 70    | 69.67   | 13 15 15        | 1    | 1    | 0    | DDA         | 1               |
| EIF4A2 | EIF3I_HUMAN  | EIF3I     | 423 399 406 | 409.33  | 72 74 80        | 1    | 1    | 0    | DIA         | 1               |
| EIF4A2 | EIF3J_HUMAN  | EIF3J     | 30 29 26    | 28.33   | 2 2 1           | 1    | 1    | 0    | DDA         | 1               |
| EIF4A2 | EIF3J_HUMAN  | EIF3J     | 138 130 126 | 131.33  | 8 7 5           | 1    | 1    | 0    | DIA         | 1               |
| EIF4A2 | EIF3K_HUMAN  | EIF3K     | 22 28 27    | 25.67   | 4 2 3           | 1    | 1    | 0    | DDA         | 1               |
| EIF4A2 | EIF3K_HUMAN  | EIF3K     | 108 98 93   | 99.67   | 6 5 6           | 1    | 1    | 0    | DIA         | 1               |
| EIF4A2 | EIF3L_HUMAN  | EIF3L     | 104 104 95  | 101     | 7 9 3           | 1    | 1    | 0    | DDA         | 1               |
| EIF4A2 | EIF3L_HUMAN  | EIF3L     | 449 459 443 | 450.33  | 19 18 18        | 1    | 1    | 0    | DIA         | 1               |
| EIF4A2 | EIF3M_HUMAN  | EIF3M     | 57 58 53    | 56      | 2 3 2           | 1    | 1    | 0    | DDA         | 1               |
| EIF4A2 | EIF3M_HUMAN  | EIF3M     | 302 267 282 | 283.67  | 5 4 2           | 1    | 1    | 0    | DIA         | 1               |
| EIF4A2 | IF4A1_HUMAN  | EIF4A1    | 32 41 42    | 38.33   | 7 5 6           | 1    | 1    | 0    | DDA         | 1               |

|        |             |             |                |         |          |      |      |      |     |   |
|--------|-------------|-------------|----------------|---------|----------|------|------|------|-----|---|
| EIF4A2 | IF4A1_HUMAN | EIF4A1      | 252 219 268    | 246.33  | 22 19 24 | 1    | 1    | 0    | DIA | 1 |
| EIF4A2 | IF4A3_HUMAN | EIF4A3      | 4 4 7          | 5       | 1 1 1    | 0.75 | 0.98 | 0.25 | DDA |   |
| EIF4A2 | IF4A3_HUMAN | EIF4A3      | 8 7 9          | 8       | 0 0 0    | 1    | 1    | 0    | DIA | 1 |
| EIF4A2 | IF4E_HUMAN  | EIF4E       | 10 10 18       | 12.67   | 0 0 0    | 1    | 1    | 0    | DDA | 1 |
| EIF4A2 | IF4E_HUMAN  | EIF4E       | 41 51 45       | 45.67   | 0 0 0    | 1    | 1    | 0    | DIA | 1 |
| EIF4A2 | IF4E3_HUMAN | EIF4E3      | 1 1 0          | 0.67    | 0 0 0    | 0    | 0    | 1    | DDA |   |
| EIF4A2 | IF4E3_HUMAN | EIF4E3      | 6 6 7          | 6.33    | 0 0 0    | 1    | 1    | 0    | DIA | 1 |
| EIF4A2 | IF4G1_HUMAN | EIF4G1      | 290 301 289    | 293.33  | 8 10 9   | 1    | 1    | 0    | DDA | 1 |
| EIF4A2 | IF4G1_HUMAN | EIF4G1      | 1419 1348 1341 | 1369.33 | 30 30 20 | 1    | 1    | 0    | DIA | 1 |
| EIF4A2 | IF4G2_HUMAN | EIF4G2      | 131 143 143    | 139     | 0 0 0    | 1    | 1    | 0    | DDA | 1 |
| EIF4A2 | IF4G2_HUMAN | EIF4G2      | 620 604 599    | 607.67  | 0 0 0    | 1    | 1    | 0    | DIA | 1 |
| EIF4A2 | IF4G3_HUMAN | EIF4G3      | 128 124 128    | 126.67  | 1 1 1    | 1    | 1    | 0    | DDA | 1 |
| EIF4A2 | IF4G3_HUMAN | EIF4G3      | 534 497 527    | 519.33  | 5 2 5    | 1    | 1    | 0    | DIA | 1 |
| EIF4A2 | ELAV1_HUMAN | ELAVL1      | 11 8 10        | 9.67    | 0 0 0    | 1    | 1    | 0    | DDA | 1 |
| EIF4A2 | ELAV1_HUMAN | ELAVL1      | 38 43 48       | 43      | 0 0 0    | 1    | 1    | 0    | DIA | 1 |
| EIF4A2 | FA98A_HUMAN | FAM98A      | 6 6 7          | 6.33    | 0 0 0    | 1    | 1    | 0    | DDA | 1 |
| EIF4A2 | FA98A_HUMAN | FAM98A      | 29 19 34       | 27.33   | 0 1 2    | 1    | 1    | 0    | DIA | 1 |
| EIF4A2 | FMR1_HUMAN  | FMR1        | 7 8 11         | 8.67    | 0 0 0    | 1    | 1    | 0    | DDA | 1 |
| EIF4A2 | FMR1_HUMAN  | FMR1        | 28 19 32       | 26.33   | 0 0 0    | 1    | 1    | 0    | DIA | 1 |
| EIF4A2 | FXR1_HUMAN  | FXR1        | 5 8 7          | 6.67    | 0 1 1    | 0.98 | 1    | 0.02 | DDA |   |
| EIF4A2 | FXR1_HUMAN  | FXR1        | 15 10 21       | 15.33   | 2 0 0    | 1    | 1    | 0    | DIA | 1 |
| EIF4A2 | FXR2_HUMAN  | FXR2        | 6 11 10        | 9       | 0 0 0    | 1    | 1    | 0    | DDA | 1 |
| EIF4A2 | FXR2_HUMAN  | FXR2        | 26 12 24       | 20.67   | 1 0 5    | 0.96 | 1    | 0.04 | DIA |   |
| EIF4A2 | G3BP2_HUMAN | G3BP2       | 7 6 11         | 8       | 0 0 0    | 1    | 1    | 0    | DDA | 1 |
| EIF4A2 | G3BP2_HUMAN | G3BP2       | 27 29 36       | 30.67   | 0 0 0    | 1    | 1    | 0    | DIA | 1 |
| EIF4A2 | GBLP_HUMAN  | GNB2L1      | 18 16 20       | 18      | 4 6 8    | 0.76 | 0.99 | 0.24 | DDA |   |
| EIF4A2 | GBLP_HUMAN  | GNB2L1      | 62 62 77       | 67      | 15 18 15 | 1    | 1    | 0    | DIA | 1 |
| EIF4A2 | HELC1_HUMAN | HELC1_HUMAN | 10 10 13       | 11      | 0 0 0    | 1    | 1    | 0    | DDA | 1 |
| EIF4A2 | HELC1_HUMAN | HELC1_HUMAN | 25 22 15       | 20.67   | 0 2 0    | 1    | 1    | 0    | DIA | 1 |
| EIF4A2 | ROA2_HUMAN  | HNRNPA2B1   | 32 31 40       | 34.33   | 8 6 8    | 1    | 1    | 0    | DDA | 1 |
| EIF4A2 | ROA2_HUMAN  | HNRNPA2B1   | 150 143 162    | 151.67  | 46 38 38 | 1    | 1    | 0    | DIA | 1 |
| EIF4A2 | ROA3_HUMAN  | HNRNPA3     | 8 5 5          | 6       | 1 1 0    | 0.97 | 1    | 0.03 | DDA |   |
| EIF4A2 | ROA3_HUMAN  | HNRNPA3     | 34 32 38       | 34.67   | 7 1 3    | 1    | 1    | 0    | DIA | 1 |
| EIF4A2 | ROAA_HUMAN  | HNRNPAB     | 8 5 8          | 7       | 2 2 2    | 0.67 | 0.9  | 0.33 | DDA |   |
| EIF4A2 | ROAA_HUMAN  | HNRNPAB     | 37 29 42       | 36      | 4 7 4    | 1    | 1    | 0    | DIA | 1 |
| EIF4A2 | HNRDL_HUMAN | HNRNPDL     | 3 4 3          | 3.33    | 0 0 0    | 0.99 | 1    | 0.01 | DDA | 1 |
| EIF4A2 | HNRDL_HUMAN | HNRNPDL     | 4 10 15        | 9.67    | 4 1 3    | 0.65 | 1    | 0.35 | DIA |   |
| EIF4A2 | HNRPL_HUMAN | HNRNPL      | 13 16 15       | 14.67   | 2 1 1    | 1    | 1    | 0    | DDA | 1 |
| EIF4A2 | HNRPL_HUMAN | HNRNPL      | 62 47 59       | 56      | 0 0 0    | 1    | 1    | 0    | DIA | 1 |
| EIF4A2 | HNRPM_HUMAN | HNRNPM      | 39 23 42       | 34.67   | 5 5 3    | 1    | 1    | 0    | DDA | 1 |
| EIF4A2 | HNRPM_HUMAN | HNRNPM      | 81 122 158     | 120.33  | 4 12 8   | 1    | 1    | 0    | DIA | 1 |
| EIF4A2 | HNRPR_HUMAN | HNRNPR      | 12 13 15       | 13.33   | 2 3 2    | 1    | 1    | 0    | DDA | 1 |
| EIF4A2 | HNRPR_HUMAN | HNRNPR      | 37 23 27       | 29      | 1 6 3    | 1    | 1    | 0    | DIA | 1 |
| EIF4A2 | IF2B1_HUMAN | IGF2BP1     | 23 24 26       | 24.33   | 0 0 1    | 1    | 1    | 0    | DDA | 1 |
| EIF4A2 | IF2B1_HUMAN | IGF2BP1     | 86 86 95       | 89      | 1 0 0    | 1    | 1    | 0    | DIA | 1 |
| EIF4A2 | IF2B2_HUMAN | IGF2BP2     | 13 14 16       | 14.33   | 0 0 0    | 1    | 1    | 0    | DDA | 1 |
| EIF4A2 | IF2B2_HUMAN | IGF2BP2     | 53 41 48       | 47.33   | 0 0 0    | 1    | 1    | 0    | DIA | 1 |
| EIF4A2 | IF2B3_HUMAN | IGF2BP3     | 9 9 11         | 9.67    | 0 0 0    | 1    | 1    | 0    | DDA | 1 |
| EIF4A2 | IF2B3_HUMAN | IGF2BP3     | 35 24 34       | 31      | 0 0 0    | 1    | 1    | 0    | DIA | 1 |
| EIF4A2 | ILF2_HUMAN  | ILF2        | 13 14 15       | 14      | 1 1 1    | 1    | 1    | 0    | DDA | 1 |
| EIF4A2 | ILF2_HUMAN  | ILF2        | 20 14 17       | 17      | 0 0 0    | 1    | 1    | 0    | DIA | 1 |
| EIF4A2 | ILF3_HUMAN  | ILF3        | 13 16 17       | 15.33   | 0 2 1    | 1    | 1    | 0    | DDA | 1 |
| EIF4A2 | ILF3_HUMAN  | ILF3        | 49 43 52       | 48      | 5 6 3    | 1    | 1    | 0    | DIA | 1 |
| EIF4A2 | LARP1_HUMAN | LARP1       | 12 14 14       | 13.33   | 0 0 0    | 1    | 1    | 0    | DDA | 1 |
| EIF4A2 | LARP1_HUMAN | LARP1       | 35 33 34       | 34      | 0 3 0    | 1    | 1    | 0    | DIA | 1 |
| EIF4A2 | LARP4_HUMAN | LARP4       | 3 4 3          | 3.33    | 0 0 0    | 0.99 | 1    | 0.01 | DDA | 1 |
| EIF4A2 | LARP4_HUMAN | LARP4       | 0 1 0          | 0.33    | 0 0 0    | 0    | 0    | 1    | DIA |   |
| EIF4A2 | LAR4B_HUMAN | LARP4B      | 2 4 5          | 3.67    | 0 0 0    | 0.98 | 1    | 0.02 | DDA |   |
| EIF4A2 | LAR4B_HUMAN | LARP4B      | 20 8 24        | 17.33   | 0 0 0    | 1    | 1    | 0    | DIA | 1 |
| EIF4A2 | LIGA_HUMAN  | EIF2D       | 3 5 5          | 4.33    | 0 0 0    | 1    | 1    | 0    | DDA | 1 |
| EIF4A2 | LIGA_HUMAN  | EIF2D       | 6 3 17         | 8.67    | 0 2 0    | 0.83 | 1    | 0.17 | DIA |   |
| EIF4A2 | LRC47_HUMAN | LRRC47      | 2 3 2          | 2.33    | 2 2 3    | 0    | 0.01 | 1    | DDA |   |
| EIF4A2 | LRC47_HUMAN | LRRC47      | 5 4 4          | 4.33    | 0 0 0    | 1    | 1    | 0    | DIA | 1 |
| EIF4A2 | LSM12_HUMAN | LSM12       | 10 14 10       | 11.33   | 0 0 0    | 1    | 1    | 0    | DDA | 1 |
| EIF4A2 | LSM12_HUMAN | LSM12       | 28 25 24       | 25.67   | 0 0 0    | 1    | 1    | 0    | DIA | 1 |
| EIF4A2 | MATR3_HUMAN | MATR3       | 20 23 27       | 23.33   | 3 1 1    | 1    | 1    | 0    | DDA | 1 |
| EIF4A2 | MATR3_HUMAN | MATR3       | 64 67 91       | 74      | 0 1 0    | 1    | 1    | 0    | DIA | 1 |
| EIF4A2 | NONO_HUMAN  | NONO        | 42 34 64       | 46.67   | 8 7 6    | 1    | 1    | 0    | DDA | 1 |
| EIF4A2 | NONO_HUMAN  | NONO        | 188 238 350    | 258.67  | 55 49 44 | 1    | 1    | 0    | DIA | 1 |
| EIF4A2 | NUFP2_HUMAN | NUFIP2      | 15 17 19       | 17      | 2 1 0    | 1    | 1    | 0    | DDA | 1 |
| EIF4A2 | NUFP2_HUMAN | NUFIP2      | 30 22 37       | 29.67   | 4 3 0    | 1    | 1    | 0    | DIA | 1 |
| EIF4A2 | OBSL1_HUMAN | OBSL1       | 2 2 1          | 1.67    | 0 0 0    | 0.85 | 0.94 | 0.15 | DDA |   |
| EIF4A2 | OBSL1_HUMAN | OBSL1       | 6 6 4          | 5.33    | 0 0 0    | 1    | 1    | 0    | DIA | 1 |
| EIF4A2 | PABP1_HUMAN | PABPC1      | 12 13 13       | 12.67   | 0 0 1    | 1    | 1    | 0    | DDA | 1 |
| EIF4A2 | PABP1_HUMAN | PABPC1      | 63 57 58       | 59.33   | 0 0 0    | 1    | 1    | 0    | DIA | 1 |
| EIF4A2 | PABP4_HUMAN | PABPC4      | 32 38 42       | 37.33   | 0 0 0    | 1    | 1    | 0    | DDA | 1 |
| EIF4A2 | PABP4_HUMAN | PABPC4      | 113 103 116    | 110.67  | 0 0 0    | 1    | 1    | 0    | DIA | 1 |
| EIF4A2 | PDCD4_HUMAN | PDCD4       | 202 174 216    | 197.33  | 0 0 0    | 1    | 1    | 0    | DDA | 1 |



|        |             |         |                |         |             |      |      |      |     |   |
|--------|-------------|---------|----------------|---------|-------------|------|------|------|-----|---|
| EIF4A2 | PDCD4_HUMAN | PDCD4   | 844 1053 1061  | 986     | 0 3 1       | 1    | 1    | 0    | DIA | 1 |
| EIF4A2 | PSPC1_HUMAN | PSPC1   | 6 3 8          | 5.67    | 1 2 4       | 0.34 | 0.78 | 0.66 | DDA | 1 |
| EIF4A2 | PSPC1_HUMAN | PSPC1   | 5 17 18        | 13.33   | 1 0 0       | 1    | 1    | 0    | DIA | 1 |
| EIF4A2 | PTBP1_HUMAN | PTBP1   | 19 25 24       | 22.67   | 1 2 4       | 1    | 1    | 0    | DDA | 1 |
| EIF4A2 | PTBP1_HUMAN | PTBP1   | 112 105 108    | 108.33  | 3 0 2       | 1    | 1    | 0    | DIA | 1 |
| EIF4A2 | PTBP2_HUMAN | PTBP2   | 2 3 2          | 2.33    | 0 0 0       | 0.95 | 0.99 | 0.05 | DDA | 1 |
| EIF4A2 | PTBP2_HUMAN | PTBP2   | 8 8 8          | 8       | 0 0 0       | 1    | 1    | 0    | DIA | 1 |
| EIF4A2 | PURA_HUMAN  | PURA    | 1 1 1          | 1       | 0 0 0       | 0    | 0    | 1    | DDA | 1 |
| EIF4A2 | PURA_HUMAN  | PURA    | 9 10 12        | 10.33   | 0 0 0       | 1    | 1    | 0    | DIA | 1 |
| EIF4A2 | RL15_HUMAN  | RPL15   | 1 1 1          | 1       | 0 0 0       | 0    | 0    | 1    | DDA | 1 |
| EIF4A2 | RL15_HUMAN  | RPL15   | 6 7 6          | 6.33    | 0 0 0       | 1    | 1    | 0    | DIA | 1 |
| EIF4A2 | RL18_HUMAN  | RPL18   | 2 2 4          | 2.67    | 1 0 0       | 0.76 | 0.99 | 0.24 | DDA | 1 |
| EIF4A2 | RL18_HUMAN  | RPL18   | 4 3 4          | 3.67    | 0 0 0       | 1    | 1    | 0    | DIA | 1 |
| EIF4A2 | RL27_HUMAN  | RPL27   | 2 1 2          | 1.67    | 1 1 1       | 0.08 | 0.12 | 0.92 | DDA | 1 |
| EIF4A2 | RL27_HUMAN  | RPL27   | 5 6 4          | 5       | 0 0 0       | 1    | 1    | 0    | DIA | 1 |
| EIF4A2 | RL4_HUMAN   | RPL4    | 2 2 5          | 3       | 1 0 1       | 0.51 | 0.95 | 0.49 | DDA | 1 |
| EIF4A2 | RL4_HUMAN   | RPL4    | 10 10 12       | 10.67   | 0 1 0       | 1    | 1    | 0    | DIA | 1 |
| EIF4A2 | RLA1_HUMAN  | RPLP1   | 1 1 2          | 1.33    | 0 1 0       | 0.36 | 0.64 | 0.64 | DDA | 1 |
| EIF4A2 | RLA1_HUMAN  | RPLP1   | 7 5 7          | 6.33    | 0 0 0       | 1    | 1    | 0    | DIA | 1 |
| EIF4A2 | RS13_HUMAN  | RPS13   | 14 13 13       | 13.33   | 7 5 6       | 0.03 | 0.05 | 0.97 | DDA | 1 |
| EIF4A2 | RS13_HUMAN  | RPS13   | 65 61 67       | 64.33   | 19 21 26    | 1    | 1    | 0    | DIA | 1 |
| EIF4A2 | RS23_HUMAN  | RPS23   | 8 9 8          | 8.33    | 3 2 3       | 0.64 | 0.81 | 0.36 | DDA | 1 |
| EIF4A2 | RS23_HUMAN  | RPS23   | 40 44 41       | 41.67   | 8 10 15     | 1    | 1    | 0    | DIA | 1 |
| EIF4A2 | RS7_HUMAN   | RPS7    | 18 20 19       | 19      | 10 13 9     | 0    | 0    | 1    | DDA | 1 |
| EIF4A2 | RS7_HUMAN   | RPS7    | 133 117 133    | 127.67  | 44 41 41    | 1    | 1    | 0    | DIA | 1 |
| EIF4A2 | RS9_HUMAN   | RPS9    | 15 9 12        | 12      | 5 6 7       | 0.06 | 0.17 | 0.94 | DDA | 1 |
| EIF4A2 | RS9_HUMAN   | RPS9    | 36 41 40       | 39      | 12 13 12    | 1    | 1    | 0    | DIA | 1 |
| EIF4A2 | SAFB1_HUMAN | SAFB    | 9 10 11        | 10      | 0 0 0       | 1    | 1    | 0    | DIA | 1 |
| EIF4A2 | SFPQ_HUMAN  | SFPQ    | 38 38 59       | 45      | 11 10 13    | 1    | 1    | 0    | DDA | 1 |
| EIF4A2 | SFPQ_HUMAN  | SFPQ    | 150 187 268    | 201.67  | 39 23 26    | 1    | 1    | 0    | DIA | 1 |
| EIF4A2 | SRSF1_HUMAN | SRSF1   | 11 8 12        | 10.33   | 2 3 1       | 0.97 | 1    | 0.03 | DDA | 1 |
| EIF4A2 | SRSF1_HUMAN | SRSF1   | 16 23 33       | 24      | 5 4 2       | 1    | 1    | 0    | DIA | 1 |
| EIF4A2 | SRSF7_HUMAN | SRSF7   | 3 5 4          | 4       | 0 0 0       | 1    | 1    | 0    | DDA | 1 |
| EIF4A2 | SRSF7_HUMAN | SRSF7   | 10 25 17       | 17.33   | 0 0 0       | 1    | 1    | 0    | DIA | 1 |
| EIF4A2 | HNRPO_HUMAN | SYNCRIP | 26 30 29       | 28.33   | 10 14 13    | 0.02 | 0.05 | 0.98 | DDA | 1 |
| EIF4A2 | HNRPO_HUMAN | SYNCRIP | 75 70 77       | 74      | 11 11 16    | 1    | 1    | 0    | DIA | 1 |
| EIF4A2 | TADBP_HUMAN | TARDBP  | 3 5 4          | 4       | 1 3 2       | 0.09 | 0.2  | 0.91 | DDA | 1 |
| EIF4A2 | TADBP_HUMAN | TARDBP  | 7 8 20         | 11.67   | 1 2 0       | 0.99 | 1    | 0.01 | DIA | 1 |
| EIF4A2 | UAP56_HUMAN | DDX39B  | 0 2 0          | 0.67    | 0 0 0       | 0.31 | 0.94 | 0.69 | DDA | 1 |
| EIF4A2 | UAP56_HUMAN | DDX39B  | 9 10 11        | 10      | 0 0 0       | 1    | 1    | 0    | DIA | 1 |
| EIF4A2 | RENT1_HUMAN | UPF1    | 5 4 7          | 5.33    | 0 0 0       | 1    | 1    | 0    | DDA | 1 |
| EIF4A2 | RENT1_HUMAN | UPF1    | 4 5 6          | 5       | 0 0 0       | 1    | 1    | 0    | DIA | 1 |
| EIF4A2 | UBP10_HUMAN | USP10   | 7 6 9          | 7.33    | 0 0 0       | 1    | 1    | 0    | DDA | 1 |
| EIF4A2 | UBP10_HUMAN | USP10   | 20 20 36       | 25.33   | 1 0 0       | 1    | 1    | 0    | DIA | 1 |
| MEPCE  | AFF4_HUMAN  | AFF4    | 8 7 9          | 8       | 0 0 0       | 1    | 1    | 0    | DDA | 1 |
| MEPCE  | AFF4_HUMAN  | AFF4    | 13 8 18        | 13      | 0 0 0       | 1    | 1    | 0    | DIA | 1 |
| MEPCE  | C1QBP_HUMAN | C1QBP   | 371 337 335    | 347.67  | 39 56 46    | 1    | 1    | 0    | DDA | 1 |
| MEPCE  | C1QBP_HUMAN | C1QBP   | 2351 1809 2333 | 2164.33 | 183 177 210 | 1    | 1    | 0    | DIA | 1 |
| MEPCE  | CCNT1_HUMAN | CCNT1   | 22 20 20       | 20.67   | 0 0 0       | 1    | 1    | 0    | DDA | 1 |
| MEPCE  | CCNT1_HUMAN | CCNT1   | 84 79 82       | 81.67   | 0 1 0       | 1    | 1    | 0    | DIA | 1 |
| MEPCE  | CCNT2_HUMAN | CCNT2   | 9 9 6          | 8       | 0 0 0       | 1    | 1    | 0    | DDA | 1 |
| MEPCE  | CCNT2_HUMAN | CCNT2   | 21 17 28       | 22      | 0 0 0       | 1    | 1    | 0    | DIA | 1 |
| MEPCE  | CDK9_HUMAN  | CDK9    | 29 28 27       | 28      | 0 0 0       | 1    | 1    | 0    | DDA | 1 |
| MEPCE  | CDK9_HUMAN  | CDK9    | 106 113 115    | 111.33  | 4 1 2       | 1    | 1    | 0    | DIA | 1 |
| MEPCE  | CHCH2_HUMAN | CHCH2   | 3 4 4          | 3.67    | 0 0 0       | 1    | 1    | 0    | DDA | 1 |
| MEPCE  | CHCH2_HUMAN | CHCH2   | 12 23 26       | 20.33   | 0 0 0       | 1    | 1    | 0    | DIA | 1 |
| MEPCE  | NEUA_HUMAN  | CMAS    | 19 22 26       | 22.33   | 0 1 1       | 1    | 1    | 0    | DDA | 1 |
| MEPCE  | NEUA_HUMAN  | CMAS    | 68 60 84       | 70.67   | 0 0 0       | 1    | 1    | 0    | DIA | 1 |
| MEPCE  | CU057_HUMAN | YBEY    | 1 1 2          | 1.33    | 0 0 0       | 0.75 | 0.94 | 0.25 | DDA | 1 |
| MEPCE  | CU057_HUMAN | YBEY    | 19 16 19       | 18      | 0 0 0       | 1    | 1    | 0    | DIA | 1 |
| MEPCE  | DDX21_HUMAN | DDX21   | 20 22 22       | 21.33   | 2 3 3       | 1    | 1    | 0    | DDA | 1 |
| MEPCE  | DDX21_HUMAN | DDX21   | 82 63 76       | 73.67   | 2 0 2       | 1    | 1    | 0    | DIA | 1 |
| MEPCE  | DDX23_HUMAN | DDX23   | 16 20 22       | 19.33   | 3 1 3       | 1    | 1    | 0    | DDA | 1 |
| MEPCE  | DDX23_HUMAN | DDX23   | 48 46 50       | 48      | 17 12 9     | 1    | 1    | 0    | DIA | 1 |
| MEPCE  | DDX5_HUMAN  | DDX5    | 13 16 13       | 14      | 7 6 7       | 0.03 | 0.08 | 0.97 | DDA | 1 |
| MEPCE  | DDX5_HUMAN  | DDX5    | 30 31 37       | 32.67   | 11 11 7     | 1    | 1    | 0    | DIA | 1 |
| MEPCE  | DDX56_HUMAN | DDX56   | 2 1 3          | 2       | 0 0 0       | 0.86 | 0.99 | 0.14 | DDA | 1 |
| MEPCE  | DDX56_HUMAN | DDX56   | 4 5 4          | 4.33    | 1 0 0       | 1    | 1    | 0    | DIA | 1 |
| MEPCE  | DHX9_HUMAN  | DHX9    | 41 44 48       | 44.33   | 12 10 13    | 1    | 1    | 0    | DDA | 1 |
| MEPCE  | DHX9_HUMAN  | DHX9    | 151 148 167    | 155.33  | 45 36 38    | 1    | 1    | 0    | DIA | 1 |
| MEPCE  | EDC4_HUMAN  | EDC4    | 3 12 14        | 9.67    | 1 0 0       | 0.98 | 1    | 0.02 | DDA | 1 |
| MEPCE  | EDC4_HUMAN  | EDC4    | 4 24 41        | 23      | 0 0 0       | 1    | 1    | 0    | DIA | 1 |
| MEPCE  | HME1_HUMAN  | EN1     | 4 4 4          | 4       | 0 0 0       | 1    | 1    | 0    | DIA | 1 |
| MEPCE  | NUCG_HUMAN  | ENDOG   | 33 28 32       | 31      | 0 0 0       | 1    | 1    | 0    | DDA | 1 |
| MEPCE  | NUCG_HUMAN  | ENDOG   | 115 132 141    | 129.33  | 0 0 0       | 1    | 1    | 0    | DIA | 1 |
| MEPCE  | BGAL_HUMAN  | GLB1    | 3 3 3          | 3       | 0 0 0       | 0.99 | 0.99 | 0.01 | DDA | 1 |
| MEPCE  | BGAL_HUMAN  | GLB1    | 2 5 7          | 4.67    | 0 0 0       | 0.98 | 1    | 0.02 | DIA | 1 |
| MEPCE  | HEX1_HUMAN  | HEXIM1  | 12 11 11       | 11.33   | 0 0 0       | 1    | 1    | 0    | DDA | 1 |

|       |             |           |             |        |          |      |      |      |     |   |
|-------|-------------|-----------|-------------|--------|----------|------|------|------|-----|---|
| MEPCE | HEX1_HUMAN  | HEXIM1    | 47 47 50    | 48     | 0 1 0    | 1    | 1    | 0    | DIA | 1 |
| MEPCE | HMX3_HUMAN  | HMX3      | 2 2 1       | 1.67   | 0 0 0    | 0.85 | 0.94 | 0.15 | DDA |   |
| MEPCE | HMX3_HUMAN  | HMX3      | 9 9 6       | 8      | 0 0 0    | 1    | 1    | 0    | DIA | 1 |
| MEPCE | ROA2_HUMAN  | HNRNPA2B1 | 24 24 29    | 25.67  | 8 6 8    | 1    | 1    | 0    | DDA | 1 |
| MEPCE | ROA2_HUMAN  | HNRNPA2B1 | 127 110 128 | 121.67 | 46 38 38 | 1    | 1    | 0    | DIA | 1 |
| MEPCE | ROAA_HUMAN  | HNRNPAB   | 3 4 6       | 4.33   | 2 2 2    | 0.18 | 0.47 | 0.82 | DDA |   |
| MEPCE | ROAA_HUMAN  | HNRNPAB   | 18 23 40    | 27     | 4 7 4    | 1    | 1    | 0    | DIA | 1 |
| MEPCE | HNRPM_HUMAN | HNRNPM    | 28 28 31    | 29     | 5 5 3    | 1    | 1    | 0    | DDA | 1 |
| MEPCE | HNRPM_HUMAN | HNRNPM    | 86 49 70    | 68.33  | 4 12 8   | 1    | 1    | 0    | DIA | 1 |
| MEPCE | HNRPR_HUMAN | HNRNPR    | 24 24 23    | 23.67  | 2 3 2    | 1    | 1    | 0    | DDA | 1 |
| MEPCE | HNRPR_HUMAN | HNRNPR    | 46 46 56    | 49.33  | 1 6 3    | 1    | 1    | 0    | DIA | 1 |
| MEPCE | HNRL1_HUMAN | HNRNPUL1  | 9 14 13     | 12     | 1 0 1    | 1    | 1    | 0    | DDA | 1 |
| MEPCE | HNRL1_HUMAN | HNRNPUL1  | 34 26 34    | 31.33  | 2 5 5    | 1    | 1    | 0    | DIA | 1 |
| MEPCE | HP1B3_HUMAN | HP1BP3    | 2 3 3       | 2.67   | 0 0 1    | 0.84 | 0.94 | 0.16 | DDA |   |
| MEPCE | HP1B3_HUMAN | HP1BP3    | 6 5 8       | 6.33   | 0 0 0    | 1    | 1    | 0    | DIA | 1 |
| MEPCE | ILF2_HUMAN  | ILF2      | 8 8 8       | 8      | 1 1 1    | 1    | 1    | 0    | DDA | 1 |
| MEPCE | ILF2_HUMAN  | ILF2      | 21 14 26    | 20.33  | 0 0 0    | 1    | 1    | 0    | DIA | 1 |
| MEPCE | ILF3_HUMAN  | ILF3      | 8 13 13     | 11.33  | 0 2 1    | 1    | 1    | 0    | DDA | 1 |
| MEPCE | ILF3_HUMAN  | ILF3      | 28 27 34    | 29.67  | 5 6 3    | 1    | 1    | 0    | DIA | 1 |
| MEPCE | IMA2_HUMAN  | KPNA2     | 56 47 49    | 50.67  | 5 6 7    | 1    | 1    | 0    | DDA | 1 |
| MEPCE | IMA2_HUMAN  | KPNA2     | 183 194 194 | 190.33 | 14 22 18 | 1    | 1    | 0    | DIA | 1 |
| MEPCE | IMA4_HUMAN  | KPNA3     | 8 4 5       | 5.67   | 0 0 1    | 1    | 1    | 0    | DDA | 1 |
| MEPCE | IMA4_HUMAN  | KPNA3     | 27 14 34    | 25     | 0 0 2    | 1    | 1    | 0    | DIA | 1 |
| MEPCE | IMA3_HUMAN  | KPNA4     | 5 8 4       | 5.67   | 0 0 1    | 1    | 1    | 0    | DDA | 1 |
| MEPCE | IMA3_HUMAN  | KPNA4     | 26 25 35    | 28.67  | 0 0 0    | 1    | 1    | 0    | DIA | 1 |
| MEPCE | LARP7_HUMAN | LARP7     | 121 114 122 | 119    | 1 1 1    | 1    | 1    | 0    | DDA | 1 |
| MEPCE | LARP7_HUMAN | LARP7     | 566 582 619 | 589    | 1 1 0    | 1    | 1    | 0    | DIA | 1 |
| MEPCE | LBR_HUMAN   | LBR       | 4 7 5       | 5.33   | 0 0 0    | 1    | 1    | 0    | DDA | 1 |
| MEPCE | LBR_HUMAN   | LBR       | 11 4 10     | 8.33   | 5 2 1    | 0.59 | 0.92 | 0.41 | DIA |   |
| MEPCE | LSM2_HUMAN  | LSM2      | 5 6 6       | 5.67   | 0 1 1    | 0.97 | 0.99 | 0.03 | DDA |   |
| MEPCE | LSM2_HUMAN  | LSM2      | 41 35 34    | 36.67  | 3 3 4    | 1    | 1    | 0    | DIA | 1 |
| MEPCE | LSM5_HUMAN  | LSM5      | 0 1 1       | 0.67   | 0 0 0    | 0    | 0    | 1    | DDA |   |
| MEPCE | LSM5_HUMAN  | LSM5      | 6 5 7       | 6      | 0 0 0    | 1    | 1    | 0    | DIA | 1 |
| MEPCE | LSM6_HUMAN  | LSM6      | 5 4 7       | 5.33   | 0 0 0    | 1    | 1    | 0    | DDA | 1 |
| MEPCE | LSM6_HUMAN  | LSM6      | 8 10 14     | 10.67  | 0 0 0    | 1    | 1    | 0    | DIA | 1 |
| MEPCE | MATR3_HUMAN | MATR3     | 5 9 4       | 6      | 3 1 1    | 0.53 | 0.99 | 0.47 | DDA |   |
| MEPCE | MATR3_HUMAN | MATR3     | 4 7 9       | 6.67   | 0 1 0    | 1    | 1    | 0    | DIA | 1 |
| MEPCE | MET10_HUMAN | METTL10   | 35 39 38    | 37.33  | 0 0 0    | 1    | 1    | 0    | DDA | 1 |
| MEPCE | MET10_HUMAN | METTL10   | 78 80 105   | 87.67  | 0 0 0    | 1    | 1    | 0    | DIA | 1 |
| MEPCE | MSH2_HUMAN  | MSH2      | 2 2 2       | 2      | 2 1 1    | 0.04 | 0.04 | 0.96 | DDA |   |
| MEPCE | MSH2_HUMAN  | MSH2      | 7 3 6       | 5.33   | 0 0 0    | 1    | 1    | 0    | DIA | 1 |
| MEPCE | NAA38_HUMAN | NAA38     | 17 11 14    | 14     | 2 3 2    | 1    | 1    | 0    | DDA | 1 |
| MEPCE | NAA38_HUMAN | NAA38     | 52 48 59    | 53     | 4 5 3    | 1    | 1    | 0    | DIA | 1 |
| MEPCE | NUCL_HUMAN  | NCL       | 56 45 47    | 49.33  | 16 16 14 | 1    | 1    | 0    | DDA | 1 |
| MEPCE | NUCL_HUMAN  | NCL       | 137 147 165 | 149.67 | 43 45 45 | 1    | 1    | 0    | DIA | 1 |
| MEPCE | NH2L1_HUMAN | NHP2L1    | 2 3 4       | 3      | 0 0 0    | 0.98 | 1    | 0.02 | DDA |   |
| MEPCE | NH2L1_HUMAN | NHP2L1    | 18 11 26    | 18.33  | 0 0 0    | 1    | 1    | 0    | DIA | 1 |
| MEPCE | NPM_HUMAN   | NPM1      | 16 17 20    | 17.67  | 5 4 4    | 1    | 1    | 0    | DDA | 1 |
| MEPCE | NPM_HUMAN   | NPM1      | 81 75 83    | 79.67  | 18 11 11 | 1    | 1    | 0    | DIA | 1 |
| MEPCE | PARP1_HUMAN | PARP1     | 24 22 15    | 20.33  | 6 10 8   | 0.55 | 0.96 | 0.45 | DDA |   |
| MEPCE | PARP1_HUMAN | PARP1     | 41 53 52    | 48.67  | 16 8 10  | 1    | 1    | 0    | DIA | 1 |
| MEPCE | PDIP2_HUMAN | POLDIP2   | 7 5 8       | 6.67   | 1 0 0    | 1    | 1    | 0    | DDA | 1 |
| MEPCE | PDIP2_HUMAN | POLDIP2   | 13 8 16     | 12.33  | 7 3 0    | 0.58 | 0.89 | 0.42 | DIA |   |
| MEPCE | PECI_HUMAN  | ECI2      | 3 4 7       | 4.67   | 0 0 1    | 0.98 | 1    | 0.02 | DDA |   |
| MEPCE | PECI_HUMAN  | ECI2      | 4 4 8       | 5.33   | 0 0 0    | 1    | 1    | 0    | DIA | 1 |
| MEPCE | PPIH_HUMAN  | PPIH      | 14 12 20    | 15.33  | 0 0 0    | 1    | 1    | 0    | DDA | 1 |
| MEPCE | PPIH_HUMAN  | PPIH      | 66 62 72    | 66.67  | 0 0 0    | 1    | 1    | 0    | DIA | 1 |
| MEPCE | PRPF3_HUMAN | PRPF3     | 39 38 48    | 41.67  | 1 1 0    | 1    | 1    | 0    | DDA | 1 |
| MEPCE | PRPF3_HUMAN | PRPF3     | 160 148 173 | 160.33 | 1 2 0    | 1    | 1    | 0    | DIA | 1 |
| MEPCE | PRP31_HUMAN | PRPF31    | 59 49 54    | 54     | 15 13 14 | 1    | 1    | 0    | DDA | 1 |
| MEPCE | PRP31_HUMAN | PRPF31    | 204 187 210 | 200.33 | 41 46 43 | 1    | 1    | 0    | DIA | 1 |
| MEPCE | PRP4_HUMAN  | PRPF4     | 45 40 40    | 41.67  | 0 1 0    | 1    | 1    | 0    | DDA | 1 |
| MEPCE | PRP4_HUMAN  | PRPF4     | 144 154 177 | 158.33 | 1 1 0    | 1    | 1    | 0    | DIA | 1 |
| MEPCE | PRP6_HUMAN  | PRPF6     | 23 28 27    | 26     | 1 5 2    | 1    | 1    | 0    | DDA | 1 |
| MEPCE | PRP6_HUMAN  | PRPF6     | 84 74 81    | 79.67  | 16 11 9  | 1    | 1    | 0    | DIA | 1 |
| MEPCE | RL12_HUMAN  | RPL12     | 6 6 5       | 5.67   | 1 1 1    | 0.91 | 0.94 | 0.09 | DDA |   |
| MEPCE | RL12_HUMAN  | RPL12     | 28 32 28    | 29.33  | 4 4 6    | 1    | 1    | 0    | DIA | 1 |
| MEPCE | RL13_HUMAN  | RPL13     | 13 13 16    | 14     | 1 2 2    | 1    | 1    | 0    | DDA | 1 |
| MEPCE | RL13_HUMAN  | RPL13     | 58 55 59    | 57.33  | 1 7 2    | 1    | 1    | 0    | DIA | 1 |
| MEPCE | RL14_HUMAN  | RPL14     | 4 4 5       | 4.33   | 0 0 1    | 1    | 1    | 0    | DDA | 1 |
| MEPCE | RL14_HUMAN  | RPL14     | 30 31 28    | 29.67  | 1 0 2    | 1    | 1    | 0    | DIA | 1 |
| MEPCE | RL15_HUMAN  | RPL15     | 4 4 5       | 4.33   | 0 0 0    | 1    | 1    | 0    | DDA | 1 |
| MEPCE | RL15_HUMAN  | RPL15     | 21 14 22    | 19     | 0 0 0    | 1    | 1    | 0    | DIA | 1 |
| MEPCE | RL18_HUMAN  | RPL18     | 7 7 8       | 7.33   | 1 0 0    | 1    | 1    | 0    | DDA | 1 |
| MEPCE | RL18_HUMAN  | RPL18     | 17 21 18    | 18.67  | 0 0 0    | 1    | 1    | 0    | DIA | 1 |
| MEPCE | RL18A_HUMAN | RPL18A    | 4 3 4       | 3.67   | 0 0 0    | 1    | 1    | 0    | DDA | 1 |
| MEPCE | RL21_HUMAN  | RPL21     | 4 2 2       | 2.67   | 0 0 0    | 0.96 | 1    | 0.04 | DDA |   |
| MEPCE | RL21_HUMAN  | RPL21     | 13 11 12    | 12     | 0 0 0    | 1    | 1    | 0    | DIA | 1 |

|       |             |          |             |        |          |      |      |      |     |   |
|-------|-------------|----------|-------------|--------|----------|------|------|------|-----|---|
| MEPCE | RL27_HUMAN  | RPL27    | 8 7 9       | 8      | 1 1 1    | 0.99 | 1    | 0.01 | DDA | 1 |
| MEPCE | RL27_HUMAN  | RPL27    | 22 20 22    | 21.33  | 0 0 0    | 1    | 1    | 0    | DIA | 1 |
| MEPCE | RL28_HUMAN  | RPL28    | 6 5 6       | 5.67   | 1 0 0    | 1    | 1    | 0    | DDA | 1 |
| MEPCE | RL28_HUMAN  | RPL28    | 14 12 12    | 12.67  | 0 0 0    | 1    | 1    | 0    | DIA | 1 |
| MEPCE | RL29_HUMAN  | RPL29    | 4 4 2       | 3.33   | 0 0 0    | 0.98 | 1    | 0.02 | DDA |   |
| MEPCE | RL29_HUMAN  | RPL29    | 18 19 19    | 18.67  | 5 6 5    | 0.99 | 1    | 0.01 | DIA | 1 |
| MEPCE | RL3_HUMAN   | RPL3     | 12 17 18    | 15.67  | 0 0 0    | 1    | 1    | 0    | DDA | 1 |
| MEPCE | RL3_HUMAN   | RPL3     | 52 52 63    | 55.67  | 0 0 0    | 1    | 1    | 0    | DIA | 1 |
| MEPCE | RL30_HUMAN  | RPL30    | 2 4 2       | 2.67   | 0 0 0    | 0.96 | 1    | 0.04 | DDA |   |
| MEPCE | RL30_HUMAN  | RPL30    | 14 8 10     | 10.67  | 0 0 0    | 1    | 1    | 0    | DIA | 1 |
| MEPCE | RL34_HUMAN  | RPL34    | 5 3 5       | 4.33   | 0 0 0    | 1    | 1    | 0    | DDA | 1 |
| MEPCE | RL34_HUMAN  | RPL34    | 11 8 11     | 10     | 0 0 0    | 1    | 1    | 0    | DIA | 1 |
| MEPCE | RL36_HUMAN  | RPL36    | 3 1 3       | 2.33   | 0 0 0    | 0.88 | 0.99 | 0.12 | DDA |   |
| MEPCE | RL36_HUMAN  | RPL36    | 14 11 13    | 12.67  | 0 0 0    | 1    | 1    | 0    | DIA | 1 |
| MEPCE | RL37_HUMAN  | RPL37    | 1 1 1       | 1      | 0 0 1    | 0    | 0    | 1    | DDA |   |
| MEPCE | RL37_HUMAN  | RPL37    | 28 24 22    | 24.67  | 0 0 0    | 1    | 1    | 0    | DIA | 1 |
| MEPCE | RL37A_HUMAN | RPL37A   | 3 3 2       | 2.67   | 0 0 0    | 0.97 | 0.99 | 0.03 | DDA |   |
| MEPCE | RL37A_HUMAN | RPL37A   | 9 7 6       | 7.33   | 0 0 0    | 1    | 1    | 0    | DIA | 1 |
| MEPCE | RL4_HUMAN   | RPL4     | 20 19 18    | 19     | 1 0 1    | 1    | 1    | 0    | DDA | 1 |
| MEPCE | RL4_HUMAN   | RPL4     | 107 111 116 | 111.33 | 0 1 0    | 1    | 1    | 0    | DIA | 1 |
| MEPCE | RL5_HUMAN   | RPL5     | 11 12 8     | 10.33  | 2 0 2    | 1    | 1    | 0    | DDA | 1 |
| MEPCE | RL5_HUMAN   | RPL5     | 26 25 28    | 26.33  | 3 3 0    | 1    | 1    | 0    | DIA | 1 |
| MEPCE | RL6_HUMAN   | RPL6     | 13 14 11    | 12.67  | 0 0 1    | 1    | 1    | 0    | DDA | 1 |
| MEPCE | RL6_HUMAN   | RPL6     | 47 41 49    | 45.67  | 1 0 1    | 1    | 1    | 0    | DIA | 1 |
| MEPCE | RL7_HUMAN   | RPL7     | 10 12 12    | 11.33  | 0 0 0    | 1    | 1    | 0    | DDA | 1 |
| MEPCE | RL7_HUMAN   | RPL7     | 51 36 47    | 44.67  | 0 0 0    | 1    | 1    | 0    | DIA | 1 |
| MEPCE | RL7A_HUMAN  | RPL7A    | 12 10 15    | 12.33  | 0 0 0    | 1    | 1    | 0    | DDA | 1 |
| MEPCE | RL7A_HUMAN  | RPL7A    | 43 39 47    | 43     | 2 3 2    | 1    | 1    | 0    | DIA | 1 |
| MEPCE | RL8_HUMAN   | RPL8     | 5 5 5       | 5      | 0 0 0    | 1    | 1    | 0    | DDA | 1 |
| MEPCE | RL8_HUMAN   | RPL8     | 27 25 22    | 24.67  | 0 0 0    | 1    | 1    | 0    | DIA | 1 |
| MEPCE | RL9_HUMAN   | RPL9     | 12 11 12    | 11.67  | 2 1 2    | 1    | 1    | 0    | DDA | 1 |
| MEPCE | RL9_HUMAN   | RPL9     | 35 22 40    | 32.33  | 2 3 1    | 1    | 1    | 0    | DIA | 1 |
| MEPCE | RLA0_HUMAN  | RPLP0    | 7 12 11     | 10     | 0 0 1    | 1    | 1    | 0    | DDA | 1 |
| MEPCE | RLA0_HUMAN  | RPLP0    | 22 24 38    | 28     | 0 0 0    | 1    | 1    | 0    | DIA | 1 |
| MEPCE | RLA1_HUMAN  | RPLP1    | 6 6 5       | 5.67   | 0 1 0    | 1    | 1    | 0    | DDA | 1 |
| MEPCE | RLA1_HUMAN  | RPLP1    | 35 39 44    | 39.33  | 0 0 0    | 1    | 1    | 0    | DIA | 1 |
| MEPCE | RLA2_HUMAN  | RPLP2    | 11 16 15    | 14     | 4 3 3    | 0.95 | 1    | 0.05 | DDA |   |
| MEPCE | RLA2_HUMAN  | RPLP2    | 93 104 113  | 103.33 | 6 8 11   | 1    | 1    | 0    | DIA | 1 |
| MEPCE | RRP1B_HUMAN | RRP1B    | 3 2 3       | 2.67   | 0 0 0    | 0.97 | 0.99 | 0.03 | DDA |   |
| MEPCE | RRP1B_HUMAN | RRP1B    | 12 8 11     | 10.33  | 0 0 0    | 1    | 1    | 0    | DIA | 1 |
| MEPCE | RL1D1_HUMAN | RSL1D1   | 3 3 3       | 3      | 0 0 0    | 0.99 | 0.99 | 0.01 | DDA | 1 |
| MEPCE | RL1D1_HUMAN | RSL1D1   | 5 11 9      | 8.33   | 1 8 6    | 0.01 | 0.02 | 0.99 | DIA |   |
| MEPCE | SNUT1_HUMAN | SART1    | 21 27 22    | 23.33  | 2 1 3    | 1    | 1    | 0    | DDA | 1 |
| MEPCE | SNUT1_HUMAN | SART1    | 81 63 95    | 79.67  | 6 3 11   | 1    | 1    | 0    | DIA | 1 |
| MEPCE | SART3_HUMAN | SART3    | 137 136 132 | 135    | 0 0 0    | 1    | 1    | 0    | DDA | 1 |
| MEPCE | SART3_HUMAN | SART3    | 600 611 686 | 632.33 | 1 3 1    | 1    | 1    | 0    | DIA | 1 |
| MEPCE | SET_HUMAN   | SET      | 13 18 21    | 17.33  | 4 2 4    | 0.99 | 1    | 0.01 | DDA | 1 |
| MEPCE | SET_HUMAN   | SET      | 66 70 73    | 69.67  | 17 12 17 | 1    | 1    | 0    | DIA | 1 |
| MEPCE | US20_HUMAN  | SNRNP200 | 30 30 41    | 33.67  | 15 16 17 | 0.1  | 0.29 | 0.9  | DDA |   |
| MEPCE | US20_HUMAN  | SNRNP200 | 75 67 105   | 82.33  | 29 23 22 | 0.99 | 1    | 0.01 | DIA | 1 |
| MEPCE | SNR40_HUMAN | SNRNP40  | 1 2 3       | 2      | 0 0 0    | 0.86 | 0.99 | 0.14 | DDA |   |
| MEPCE | SNR40_HUMAN | SNRNP40  | 11 6 8      | 8.33   | 0 1 0    | 1    | 1    | 0    | DIA | 1 |
| MEPCE | SRSF7_HUMAN | SRSF7    | 1 2 3       | 2      | 0 0 0    | 0.86 | 0.99 | 0.14 | DDA |   |
| MEPCE | SRSF7_HUMAN | SRSF7    | 5 3 6       | 4.67   | 0 0 0    | 1    | 1    | 0    | DIA | 1 |
| MEPCE | LA_HUMAN    | SSB      | 66 70 66    | 67.33  | 11 10 10 | 1    | 1    | 0    | DDA | 1 |
| MEPCE | LA_HUMAN    | SSB      | 348 356 388 | 364    | 42 39 36 | 1    | 1    | 0    | DIA | 1 |
| MEPCE | SSBP_HUMAN  | SSBP1    | 4 5 6       | 5      | 0 0 3    | 0.67 | 0.78 | 0.33 | DDA |   |
| MEPCE | SSBP_HUMAN  | SSBP1    | 7 8 16      | 10.33  | 0 0 0    | 1    | 1    | 0    | DIA | 1 |
| MEPCE | HNRPO_HUMAN | SYNCRIP  | 39 35 33    | 35.67  | 10 14 13 | 0.88 | 1    | 0.12 | DDA |   |
| MEPCE | HNRPO_HUMAN | SYNCRIP  | 92 104 118  | 104.67 | 11 11 16 | 1    | 1    | 0    | DIA | 1 |
| MEPCE | TMCO6_HUMAN | TMCO6    | 3 3 6       | 4      | 0 0 0    | 0.99 | 1    | 0.01 | DDA | 1 |
| MEPCE | TMCO6_HUMAN | TMCO6    | 13 11 27    | 17     | 0 0 0    | 1    | 1    | 0    | DIA | 1 |
| MEPCE | TUT1_HUMAN  | TUT1     | 0 1 2       | 1      | 0 0 0    | 0.53 | 0.94 | 0.47 | DDA |   |
| MEPCE | TUT1_HUMAN  | TUT1     | 5 3 6       | 4.67   | 0 0 0    | 1    | 1    | 0    | DIA | 1 |
| MEPCE | SNUT2_HUMAN | USP39    | 5 11 7      | 7.67   | 1 0 0    | 1    | 1    | 0    | DDA | 1 |
| MEPCE | SNUT2_HUMAN | USP39    | 19 27 34    | 26.67  | 0 0 0    | 1    | 1    | 0    | DIA | 1 |
| MEPCE | ZNS11_HUMAN | ZNF511   | 8 8 9       | 8.33   | 0 0 0    | 1    | 1    | 0    | DDA | 1 |
| MEPCE | ZNS11_HUMAN | ZNF511   | 24 21 36    | 27     | 0 0 0    | 1    | 1    | 0    | DIA | 1 |

**Supplementary Table 2.** Gene Ontology enrichment analysis of the high confident interaction partners for MEPCE and EIF4A2 identified in common by MSGFDB-DDA and MSPLIT-DIA (orange shading) or only by MSPLIT-DIA (green shading). GO analysis was performed at DAVID (<http://david.abcc.ncifcrf.gov/>) using GO Molecular Function FAT. Only categories with Pvalue < 0.001 are listed. Note the similarity in categories detected for preys identified by both approaches and by the MSPLIT-DIA approach only, attesting to the recovery of biologically relevant partners by MSPLIT-DIA.

| GO term                                                                | Count | %    | Pvalue   | List total | Pop Hits | Pop Total | Fold enrich | Bonferroni | Benjamini  | FDR        |
|------------------------------------------------------------------------|-------|------|----------|------------|----------|-----------|-------------|------------|------------|------------|
| <b>MEPCE common</b>                                                    |       |      |          |            |          |           |             |            |            |            |
| GO:0003723~RNA binding                                                 | 35    | 62.5 | 4.97E-31 | 52         | 718      | 12983     | 12.17069316 | 5.31E-29   | 5.31E-29   | 5.58E-28   |
| GO:0003735~structural constituent of ribosome                          | 17    | 30.4 | 1.42E-18 | 52         | 168      | 12983     | 25.26453755 | 1.52E-16   | 7.58E-17   | 1.59E-15   |
| GO:0005198~structural molecule activity                                | 17    | 30.4 | 1.26E-09 | 52         | 634      | 12983     | 6.694703955 | 1.35E-07   | 4.49E-08   | 1.42E-06   |
| GO:0017069~snRNA binding                                               | 4     | 7.14 | 6.72E-06 | 52         | 10       | 12983     | 99.86923077 | 7.19E-04   | 1.80E-04   | 0.00755487 |
| GO:0031202~RNA splicing factor activity, transesterification mechanism | 4     | 7.14 | 1.09E-04 | 52         | 24       | 12983     | 41.61217949 | 0.01160111 | 0.00233107 | 0.12250982 |
| GO:0019843~rRNA binding                                                | 4     | 7.14 | 1.94E-04 | 52         | 29       | 12983     | 34.43766578 | 0.02056318 | 0.00345693 | 0.21803499 |
| <b>MEPCE DIA</b>                                                       |       |      |          |            |          |           |             |            |            |            |
| GO:0003723~RNA binding                                                 | 15    | 57.7 | 1.14E-12 | 24         | 718      | 12983     | 11.30135794 | 9.77E-11   | 9.77E-11   | 1.23E-09   |
| GO:0003735~structural constituent of ribosome                          | 8     | 30.8 | 1.10E-08 | 24         | 168      | 12983     | 25.75992063 | 9.49E-07   | 4.75E-07   | 1.19E-05   |
| GO:0005198~structural molecule activity                                | 9     | 34.6 | 7.90E-06 | 24         | 634      | 12983     | 7.679219243 | 6.79E-04   | 2.26E-04   | 0.00851335 |
| <b>EIF4A2 common</b>                                                   |       |      |          |            |          |           |             |            |            |            |
| GO:0003743~translation initiation factor activity                      | 19    | 35.2 | 8.07E-31 | 50         | 61       | 12983     | 80.87770492 | 5.89E-29   | 5.89E-29   | 8.42E-28   |
| GO:0003723~RNA binding                                                 | 32    | 59.3 | 2.47E-27 | 50         | 718      | 12983     | 11.57259053 | 1.80E-25   | 9.00E-26   | 2.57E-24   |
| GO:0008135~translation factor activity, nucleic acid binding           | 19    | 35.2 | 1.16E-26 | 50         | 98       | 12983     | 50.3422449  | 8.45E-25   | 2.82E-25   | 1.21E-23   |
| GO:0000166~nucleotide binding                                          | 28    | 51.9 | 2.20E-09 | 50         | 2245     | 12983     | 3.238521158 | 1.60E-07   | 4.01E-08   | 2.29E-06   |
| GO:0003729~mRNA binding                                                | 8     | 14.8 | 4.59E-09 | 50         | 66       | 12983     | 31.47393939 | 3.35E-07   | 6.71E-08   | 4.80E-06   |
| GO:0070035~purine NTP-dependent helicase activity                      | 6     | 11.1 | 3.24E-05 | 50         | 98       | 12983     | 15.89755102 | 0.00236339 | 3.94E-04   | 0.03382735 |
| GO:0008026~ATP-dependent helicase activity                             | 6     | 11.1 | 3.24E-05 | 50         | 98       | 12983     | 15.89755102 | 0.00236339 | 3.94E-04   | 0.03382735 |
| GO:0048027~mRNA 5'-UTR binding                                         | 3     | 5.56 | 8.33E-05 | 50         | 4        | 12983     | 194.745     | 0.00606448 | 8.69E-04   | 0.08693943 |
| GO:0045182~translation regulator activity                              | 4     | 7.41 | 1.72E-04 | 50         | 29       | 12983     | 35.81517241 | 0.01249978 | 0.00157108 | 0.17969336 |
| GO:0004386~helicase activity                                           | 6     | 11.1 | 1.77E-04 | 50         | 140      | 12983     | 11.12828571 | 0.0128217  | 0.00143282 | 0.18434688 |
| GO:0000339~RNA cap binding                                             | 3     | 5.56 | 3.85E-04 | 50         | 8        | 12983     | 97.3725     | 0.02772683 | 0.0028079  | 0.40124589 |
| <b>EIF4A2 DIA</b>                                                      |       |      |          |            |          |           |             |            |            |            |
| GO:0003723~RNA binding                                                 | 22    | 73.3 | 8.26E-21 | 30         | 718      | 12983     | 13.26025998 | 5.29E-19   | 5.29E-19   | 8.39E-18   |
| GO:0003735~structural constituent of ribosome                          | 9     | 30   | 2.27E-09 | 30         | 168      | 12983     | 23.18392857 | 1.45E-07   | 7.25E-08   | 2.30E-06   |
| GO:0003724~RNA helicase activity                                       | 4     | 13.3 | 3.52E-05 | 30         | 29       | 12983     | 59.69195402 | 0.0022511  | 7.51E-04   | 0.03576661 |
| GO:0005198~structural molecule activity                                | 9     | 30   | 5.33E-05 | 30         | 634      | 12983     | 6.143375394 | 0.00340312 | 8.52E-04   | 0.0540968  |
| GO:0003729~mRNA binding                                                | 4     | 13.3 | 4.17E-04 | 30         | 66       | 12983     | 26.22828283 | 0.02635007 | 0.00532645 | 0.42297984 |

**Supplementary Table 3.** This table describes the datasets used in the analysis. Raw mass spectrometry data were deposited in the MassIVE repository at: <http://massive.ucsd.edu/ProteoSAFe/status.jsp?task=a4b32b9ba82e4885a8956b97ca71a1f8>

| List of datasets                         | index | Raw file name                                       |
|------------------------------------------|-------|-----------------------------------------------------|
| UPS only samples                         | 1     | 18506_REP3_40fmol_UPS2_IDA_1                        |
|                                          | 2     | 18507_REP3_40fmol_UPS2_SWATH_1                      |
|                                          | 3     | 18508_REP3_400fmol_UPS2_IDA_1                       |
|                                          | 4     | 18509_REP3_400fmol_UPS2_SWATH_1                     |
|                                          | 5     | 18510_REP3_40fmol_UPS1_IDA_1                        |
|                                          | 6     | 18511_REP3_40fmol_UPS1_SWATH_1                      |
|                                          | 7     | 18512_REP3_400fmol_UPS1_IDA_1                       |
|                                          | 8     | 18513_REP3_400fmol_UPS1_SWATH_1                     |
| UPS spiked in with <i>E. coli</i> lysate | 9     | 18485_REP3_1ug_Ecoli_IDA_NewStock2_2                |
|                                          | 10    | 18486_REP3_1ug_Ecoli_SWATH_NewStock2_2              |
|                                          | 11    | 18487_REP3_40fmol_UPS1_1ug_Ecoli_IDA_NewStock2_1    |
|                                          | 12    | 18488_REP3_40fmol_UPS1_1ug_Ecoli_SWATH_NewStock2_1  |
|                                          | 13    | 18489_REP3_400fmol_UPS1_1ug_Ecoli_IDA_NewStock2_1   |
|                                          | 14    | 18490_REP3_400fmol_UPS1_1ug_Ecoli_SWATH_NewStock2_1 |
|                                          | 15    | 18491_REP3_40fmol_UPS2_1ug_Ecoli_IDA_NewStock2_1    |
|                                          | 16    | 18492_REP3_40fmol_UPS2_1ug_Ecoli_SWATH_NewStock2_1  |
|                                          | 17    | 18493_REP3_400fmol_UPS2_1ug_Ecoli_IDA_NewStock2_1   |
|                                          | 18    | 18494_REP3_400fmol_UPS2_1ug_Ecoli_SWATH_NewStock2_1 |
| UPS spiked in with human lysate          | 19    | 18467_REP3_500ng_HumanLysate_IDA_1                  |
|                                          | 20    | 18468_REP3_500ng_HumanLysate_SWATH_1                |
|                                          | 21    | 18469_REP3_40fmol_UPS1_500ng_HumanLysate_IDA_1      |
|                                          | 22    | 18470_REP3_40fmol_UPS1_500ng_HumanLysate_SWATH_1    |
|                                          | 23    | 18473_REP3_40fmol_UPS2_500ng_HumanLysate_IDA_1      |
|                                          | 24    | 18474_REP3_40fmol_UPS2_500ng_HumanLysate_SWATH_1    |
|                                          | 25    | 18475_REP3_400fmol_UPS2_500ng_HumanLysate_IDA_1     |
|                                          | 26    | 18476_REP3_400fmol_UPS2_500ng_HumanLysate_SWATH_1   |
| AP-MS data                               | 27    | IDA_EIF4aJune7-Biorep1                              |
|                                          | 28    | IDA_EIF4aJune7-Biorep2                              |
|                                          | 29    | IDA_EIF4aJune7-Biorep3                              |
|                                          | 30    | IDA_GFPJune7-Biorep1                                |
|                                          | 31    | IDA_GFPJune7-Biorep2                                |
|                                          | 32    | IDA_GFPJune7-Biorep3                                |
|                                          | 33    | IDA_MEPCEJune7-Biorep1                              |
|                                          | 34    | IDA_MEPCEJune7-Biorep2                              |
|                                          | 35    | IDA_MEPCEJune7-Biorep3                              |
|                                          | 36    | Swath_EIF4aJune7-Biorep2                            |
|                                          | 37    | Swath_EIF4aJune7-Biorep3                            |
|                                          | 38    | Swath_EIFraJune7-Biorep1                            |
|                                          | 39    | Swath_GFPJune7-Biorep1                              |
|                                          | 40    | Swath_GFPJune7-Biorep2                              |
|                                          | 41    | Swath_GFPJune7-Biorep3                              |
|                                          | 42    | Swath_MEPCEJune7-Biorep1                            |
|                                          | 43    | Swath_MEPCEJune7-Biorep2b                           |
|                                          | 44    | Swath_MEPCEJune7-Biorep3                            |
